1                   **The CRISPR-Cas System differentially regulates surface-attached and pellicle-biofilm in**  
2                                           ***Salmonella enterica* serovar Typhimurium**

3                                           Nandita Sharma\*, Ankita Das, Pujitha Raja, Sandhya Amol Marathe\*

4                   Department of Biological Sciences, Birla Institute of Technology and Science (BITS), Pilani.  
5                                           Rajasthan, India

6                   \* **Corresponding authors:**

7                   Sandhya Amol Marathe. E-mail: [sandhya.marathe@pilani.bits-pilani.ac.in](mailto:sandhya.marathe@pilani.bits-pilani.ac.in),

8                   Nandita Sharma. E-mail: [nandita1991@gmail.com](mailto:nandita1991@gmail.com)

9

10

11

12

13

14

15

16

17

18

19

20

21

22

23

24

25

26

27

28

29

30

31

## Abstract

32 CRISPR-Cas (Clustered Regularly Interspaced Short Palindromic Repeats-CRISPR associated) system  
33 has been studied for its role in biofilm regulation and expression of outer membrane proteins  
34 in *Salmonella*. We investigated the CRISPR-Cas mediated biofilm regulation in *Salmonella*  
35 *enterica* serovar Typhimurium by deleting CRISPR-Cas components,  $\Delta$ *crisprI*,  $\Delta$ *crisprII*,  $\Delta$  $\Delta$ *crisprI*  
36 *crisprII*, and  $\Delta$ *cas op*. We determined that the system positively regulates surface-biofilm while  
37 inhibiting pellicle-biofilm. In knockout strains, flagellar (*fliC*, *flgK*) and curli (*csgA*) genes were  
38 repressed, causing reduced surface-biofilm. Conversely, they displayed altered pellicle-biofilm  
39 architecture possessing bacterial multilayers and a denser ECM with enhanced cellulose and lesser  
40 Curli, ergo weaker pellicle. The intracellular cellulose concentration was less in the knockout strains  
41 due to upregulation of *bcsC*, necessary for cellulose export. We hypothesized that exported cellulose  
42 integrates into the pellicle. We determined that *crp* is upregulated in the knockout strains, thereby  
43 inhibiting the expression of *csgD*, hence *csgA* and *bcsA*. The conflicting upregulation of *bcsC*, the last  
44 gene of *bcsABZC* operon, could be independently regulated by the CRISPR-Cas system owing to a  
45 partial match between the CRISPR-spacers and *bcsC* gene. The CRP-mediated regulation of the  
46 flagellar genes in the knockout strains was probably circumvented through the regulation of Yddx  
47 governing the availability of  $\sigma^{28}$  factor that further regulates class3 flagellar genes (*fliC*, *flgK*).  
48 Additionally, the variations in the LPS profile and expression of LPS-related genes (*rfaC*, *rfaG*, *rfaI*) in  
49 the knockout strains could also contribute to the altered pellicle architecture. Collectively, we  
50 establish that the CRISPR-Cas system differentially regulates the formation of surface-attached and  
51 pellicle-biofilm.

52 **Keywords:** *Salmonella*, type I-E CRISPR-Cas system, surface-attached biofilm, pellicle-biofilm

53

## Introduction

54 Clustered Regularly Interspaced Short Palindromic Repeats (CRISPR)-CRISPR-associated (Cas) system  
55 bestows adaptive immunity to bacteria against invading mobile genetic elements (MGE) [1]. It  
56 captures proto-spacers from invading MGE's and incorporates them in the CRISPR array with the help  
57 of Cas proteins [2]. The system has also been implicated in alternative functions like governing  
58 virulence and bacterial physiology [3]. In some bacterial species, including *Salmonella*, selective  
59 proto-spacers have been traced to chromosomes, thereby supporting a role for the CRISPR-Cas  
60 system in endogenous gene regulation [4] [5]. *Salmonella* possesses a type I-E CRISPR-Cas system  
61 comprising two CRISPR arrays, CRISPR-I and CRISPR-II, and one *cas* operon [4]. This system has been  
62 demonstrated to regulate biofilm formation in *Salmonella enterica* subspecies *enterica* serovar  
63 Enteritidis by regulating the quorum-sensing system [6]. It also regulates the expression of outer  
64 membrane proteins in serovar Typhi, thereby impacting the biofilm formation and resistance to bile  
65 [7].

66 *Salmonella* is one among the four leading causes of diarrheal diseases worldwide [8]. Salmonellosis,  
67 a disease caused by *Salmonella*, presents a formidable threat to humans while causing typhoid fever  
68 in ~14.3 million individuals with 135,000 estimated deaths worldwide[9]. *Salmonella enterica* forms  
69 biofilms on medically important surfaces like medical devices (catheters, endoscopy tubes, etc.) and

70 gallstones[10], complicating the treatment processes. Biofilm formation on food surfaces has also  
71 been correlated to *Salmonella*'s persistence, thereby safeguarding it throughout food processing[11].  
72 Biofilm formation on cholesterol-rich gallstones is conceived as a significant factor influencing the  
73 establishment of a chronic carrier state, accounting for 1-6 % of total typhoid cases[12],[13]. Biofilm  
74 aids *Salmonella* virulence by facilitating evasion of the hosts' immune response and increasing  
75 antibiotic tolerance as biofilms are impenetrable to antibiotics.

76 In this study, we evaluated if and how the endogenous CRISPR-Cas system plays a role in regulating  
77 the biofilm formation of *Salmonella enterica* subspecies *enterica* serovar Typhimurium (*S.*  
78 Typhimurium). We found that the CRISPR-Cas system differentially regulated surface-attached and  
79 pellicle biofilm formation by altering the expression of biofilm-associated genes.

## 80 **Importance**

81 In addition to being implicated in bacterial immunity and genome editing, the CRISPR-Cas system has  
82 recently been demonstrated to regulate endogenous gene expression and biofilm formation. While  
83 the function of individual *cas* genes in controlling *Salmonella* biofilm has been explored, the  
84 regulatory role of CRISPR arrays in biofilm is less studied. Moreover, studies have focused on the  
85 effects of the CRISPR-Cas system on surface-associated biofilms, and comprehensive studies on the  
86 impact of the system on pellicle biofilm remain an unexplored niche. We demonstrate that the  
87 CRISPR array and *cas* genes modulate the expression of various biofilm genes in *Salmonella*, whereby  
88 surface- and pellicle-biofilm formation is distinctively regulated.

89

90

## **Material and Methods**

### 91 **Bacterial strains and culture conditions**

92 *S. Typhimurium* str. 14028s was used as a parent strain (wildtype, WT 14028s). The wildtype, CRISPR,  
93 and *cas* knockout strains (the knockout construction is explained below) and their corresponding  
94 complement strains were routinely grown in Luria-Bertani (LB, HiMedia) with appropriate antibiotics  
95 (Supplementary table 1) at 37°C, 120 rpm. The bacterial strains were also sub-cultured and grown in  
96 biofilm-media (LB without NaCl: 1% tryptone, 0.5% yeast extract) for observing growth patterns up  
97 to 12 h.

### 98 **Construction of CRISPR and *cas* operon knockout strains**

99 We generated the CRISPR and *cas* operon knockout strains,  $\Delta$ *crisprI* (CRISPR-I array deleted),  $\Delta$ *crisprII*  
100 (CRISPR-II array deleted),  $\Delta\Delta$ *crisprI crisprII* (CRISPR-I and CRISPR-II arrays deleted), and  $\Delta$ *cas op.* (*cas*  
101 operon deleted) using a one-step gene knockout strategy described by Datsenko *et al.*[14]. A phage  
102 lambda-derived Red recombination system (supplied on the pKD46 plasmid) was used to replace the  
103 desired genes in *S. Typhimurium* str. 14028s with a chloramphenicol resistance cassette. The double  
104 knockout strain,  $\Delta\Delta$ *crisprI crisprII*, was constructed by replacing the *crisprI* gene with a kanamycin  
105 resistance cassette in the  $\Delta$ *crisprII* strain. The primers used for knockout generation are listed in  
106 supplementary table 2.

107 **Generation of complement strains for the knockout**

108 The *crisprI* and *crisprII* genes were amplified using the respective cloning primers listed in  
109 supplementary table 2. The amplified products were cloned into *Bam*HI and *Hind*III sites of pQE60 (A  
110 kind gift from Prof. Dipshikha Chakravorty, Indian Institute of Science, India). The positive constructs  
111 were transformed into the respective knockout strains to obtain corresponding complement strains,  
112  $\Delta$ *crisprI* + *pcrisprI* and  $\Delta$ *crisprII* + *pcrisprII*.

113 **Biofilm quantification using crystal violet (CV) assay:**

114 *Tube biofilm assay* - Overnight grown bacterial cultures were subcultured at 1:100 ratios in LB  
115 supplemented with 3% Ox Bile (HiMedia). These cultures were added in 1.5 mL microcentrifuge tubes  
116 coated with 1 mg cholesterol and subsequently incubated at 37°C under static conditions for 96 h.  
117 Every day, the media was replaced with fresh media (LB+3% Ox-bile). The biofilms were quantified  
118 using a CV assay.

119 *Ring and pellicle biofilm* - Overnight grown bacterial cultures were subcultured at 1:100 ratio in LB  
120 without NaCl media in test-tube and incubated at 25°C under static conditions for 24 h, 48 h, and 96  
121 h. The biofilms were quantified using a CV assay.

122 *Crystal violet (CV) assay* - The biofilms formed were given washes with phosphate-buffered saline  
123 (PBS), dried at 56°C for 30 mins, and stained with 1% (w/v) CV solution for 20 mins. After washing  
124 with distilled water, biofilms were quantified by solubilizing the biofilm-bound CV with 30% (v/v)  
125 glacial acetic acid and recording the absorbance of the solution at 570 nm using Multiskan GO  
126 (Thermo Scientific, USA).

127 **Biofilm dry mass and viability assay**

128 Biofilm dry mass was estimated by recording the weight of the pellicle biofilms dried in a hot air oven  
129 at 56°C.

130 *Resazurin-based viability assay* -The pellicle biofilms were washed twice with distilled water and  
131 stained with resazurin (HiMedia) dye (0.337 mg/mL) for 30 mins at room temperature (RT). The  
132 resazurin fluorescence was measured using Fluoroskan Ascent® (Thermo Scientific, USA) at excitation  
133 ( $\lambda_{Ex}$ ) 550 nm and emission ( $\lambda_{Em}$ ) of 600 nm.

134 **Biofilm architecture using field emission scanning electron microscopy (SEM)**

135 The pellicle biofilms were allowed to form in the glass tube containing an immersed glass slide. The  
136 pellicle biofilms fixed with 2.5% glutaraldehyde were dehydrated with increasing ethanol  
137 concentrations. The samples were air-dried, sputter-coated with gold, and visualized with FEI ApreOS  
138 Field Emission Scanning Electron Microscope (Oxford Instruments, Netherland).

139 **Confocal laser scanning microscopy (CLSM) for pellicle biofilm**

140 The pellicle biofilm was stained with 5  $\mu$ M SYTO 9 (Thermo Scientific), 5  $\mu$ M Propidium Iodide (PI)  
141 (Thermo Scientific), and 50  $\mu$ M Calcofluor white (SIGMA-ALDRICH) solution for 30 mins, in the dark  
142 at RT. Slides were imaged with an LSM 880 Confocal Microscope (Zeiss, Germany) using Z-stack (ZEN  
143 2.3 SPI).

## 144 **Motility Assay**

145 Five microlitres of overnight cultures were spot inoculated at the center of swarm petri-plates (20  
146 g/L Luria Broth, 0.5% (w/v) agar and 0.5% (w/v) glucose). After 45-50 mins of air drying, the plates  
147 were incubated at 37°C for 9 h. The swarm rate was estimated by calculating the radius of the growth  
148 front using Image J Software (U. S. National Institutes of Health, USA).

## 149 **Evaluation of the expression of flagellar proteins**

150 Planktonic bacterial cells and pellicle biofilms were lysed in Laemmli buffer. Pellicle biofilms (96 h)  
151 were homogenized with TissueLyser LT (QIAGEN, Germany) at 50 kHz for 10 mins. An equal amount  
152 of each lysate (50 µg protein from planktonic and 400 µg from pellicle biofilm) was processed for  
153 immunoblotting using an anti-flagellin (DIFCO) antibody. The immunoblots were developed, and  
154 images were captured with the ChemiDoc XRS+ system (Bio-Rad Laboratories, USA). Each  
155 immunoblot band was normalized to coomassie stained bands, and the relative ratio of each with  
156 WT was quantified using Image Lab software (Bio-Rad Laboratories, USA).

## 157 **Cellulose Determination**

158 Cellulose dry weight estimation, calcofluor binding, and anthrone assay was used to estimate  
159 cellulose content in the pellicle biofilm. For cellulose dry weight estimation, pellicle biofilms were  
160 washed twice with distilled water and hydrolyzed with 0.1 M sodium hydroxide (NaOH) at 80°C for 2  
161 h. The samples were dried and weighed.

162 *Cellulose quantification by calcofluor:* The pellicle biofilms were rinsed twice with distilled water,  
163 stained with 50 µM calcofluor white stain (SIGMA-ALDRICH) for 40 mins in the dark at RT. The bound  
164 calcofluor was measured at excitation ( $\lambda_{Ex}$ ) 350 nm and emission ( $\lambda_{Em}$ ) of 475 nm with VICTOR 3 1420  
165 Multilabel Counter (PerkinElmer, USA).

166 *Cellulose quantification by anthrone:* The bacterial pellets from planktonic cultures were  
167 resuspended in 300 µL of an acetic-nitric reagent and incubated for 30 mins at boiling temperatures.  
168 The pellets were then washed twice with sterile water, followed by adding 67% sulphuric acid with  
169 intermittent mixings, and incubated at RT for 1 h. The samples were placed on an ice bath, and 1 mL  
170 of cold anthrone reagent (FISHER SCIENTIFIC) was added and mixed gently. The tubes were incubated  
171 in a boiling water bath for 15 mins, after which they were placed on ice. The absorbance at 620 nm  
172 was recorded with Multiskan GO.

## 173 **Whole-cell Congo red depletion assay**

174 The planktonic cultures grown for 48 h under static conditions were pelleted at 10,000 x g, 5 mins  
175 and resuspended Congo red solution (10 µg/mL). After 10 mins incubation at RT, the cells were  
176 centrifuged at 10,000 x g, 10 mins. The absorbance of the supernatant was measured at 500 nm with  
177 Multiskan GO.

## 178 **Curli estimation by ThT fluorescence**

179 The pellicle biofilms were lysed with a lysis buffer (Tris EDTA, pH 7.5 and 2% SDS) at 95°C for 45 mins.  
180 The insoluble pellet was washed twice with autoclaved water and resuspended in PBS containing

181 DNase (1 mg/mL, HiMedia) and RNase (20 mg/mL, HiMedia). After 6 h incubation at RT, the samples  
182 were treated with 2  $\mu$ M of ThT (SIGMA-ALDRICH) for 15-20 mins in the dark. The absorbance was  
183 measured at excitation ( $\lambda_{Ex}$ ) 440 nm and emission ( $\lambda_{Em}$ ) 482 nm with the VICTOR 3 1420 Multilabel  
184 Counter.

### 185 **Quantitative real-time (q-RT) PCR**

186 Total RNA from 24 h bacterial culture in LB without NaCl was isolated from bacteria using TRIzol  
187 reagent (HiMedia) and cDNA synthesized using ProtoScript<sup>®</sup> II Reverse Transcriptase (NEB). qRT-PCR  
188 was performed using PowerUp<sup>™</sup> SYBR<sup>™</sup> Green Master Mix (Thermo Fisher Scientific). Relative  
189 expression of the gene was calculated using the  $2^{-\Delta\Delta C_t}$  method by normalizing to reference gene *rpoD*.  
190 The primers used in RT-qPCR are listed in supplementary table 2.

### 191 **Statistical analysis**

192 Statistical analysis was performed using Prism 8 software (GraphPad, California). Unpaired Student's  
193 *t* test was performed. Error bars indicate SD. Statistical significance: \*,  $P \leq 0.05$ , \*\*,  $P \leq 0.01$ , \*\*\*,  $P \leq$   
194  $0.001$ , \*\*\*\*,  $P < 0.0001$ , ns = not significant.

## 195 **Results**

### 196 **CRISPR-Cas knockout strains show temporal variations in the biofilm formation**

197 We tested the biofilm-forming ability of the CRISPR and *cas operon* knockout strains ( $\Delta$ *crisprI*,  
198  $\Delta$ *crisprII*,  $\Delta$ *cas op.*, and  $\Delta\Delta$ *crisprI crisprII*) of *S. Typhimurium* str. 14028s under gall-stone mimicking  
199 conditions. At the end of the 96 h, all the knockout strains showed reduced biofilm formation  
200 compared to WT (Fig.1A). The phenotypes exhibited by the knockout strains were restored on the  
201 complementation of corresponding genes in  $\Delta$ *crisprI* and  $\Delta$ *crisprII* (Fig. 1A). This confirms that the  
202 gene deletions were clean without any side effects. Next, a time-dependent study determining the  
203 biofilm formation by the knockout strains in low osmotic conditions (LB without NaCl) showed  
204 temporal variations in biofilm phenotypes compared to that of the WT (Fig.1B). The knockout strains  
205 formed a thin biofilm ring on the solid-liquid-air interface (surface biofilm) at 24 h (Fig.1B) and 96 h  
206 (Supplementary figure, Fig. S1A).

207 However, as time progressed, the knockout strains displayed a gradual increase in biofilm formation,  
208 with a significantly high biofilm at 96 h (Fig.1B, and Supplementary figure, Fig. S1B). The difference  
209 in observed biofilm phenotype was not accredited to the difference in bacterial growth as testified  
210 by the similar growth patterns of all the strains in LB without NaCl media (Supplementary figure, Fig.  
211 S2).

### 212 **Scanning Electron Microscopy (SEM) depicts the difference in the biofilm architecture of CRISPR- 213 Cas knockout strains**

214 SEM was used to investigate the biofilm architecture at early (24 h) and late (96 h) time points. At 24  
215 h, the micrographs of WT showed more aggregated and tightly packed bacterial cells covering the  
216 large surface area (Supplementary figure, Fig. S3). In contrast, the micrographs of all the knockout

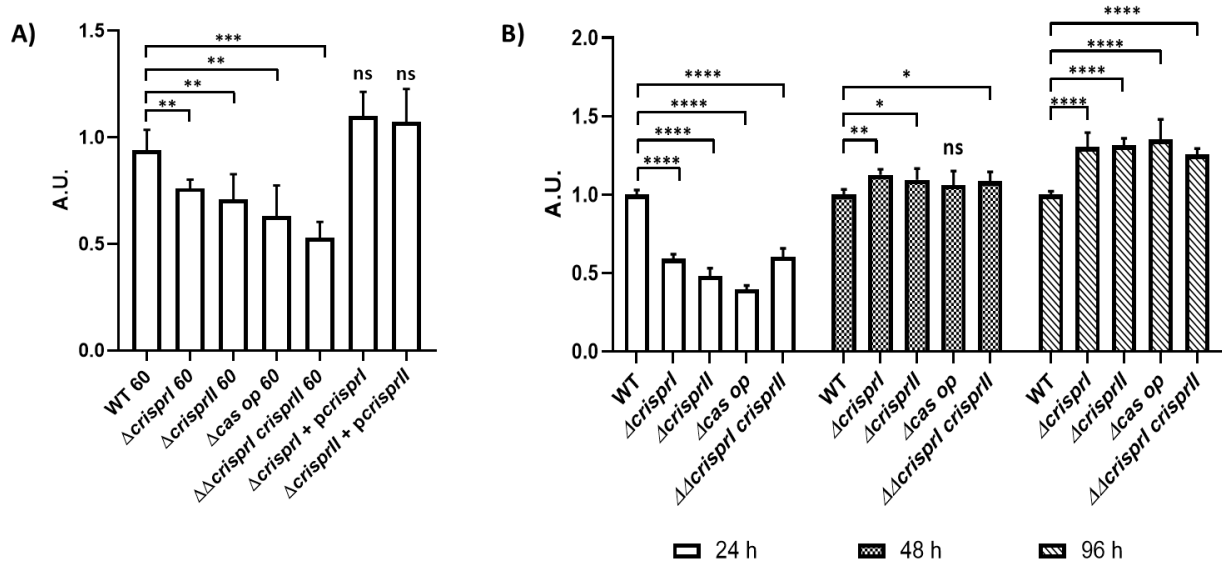

217

218 **Figure 1: The CRISPR-Cas system knockout strains of *S. enterica* subsp. *enterica* serovar Typhimurium 14028s showed**  
 219 **reduced biofilm formation under gallstone mimicking condition (A), while these strains showed temporal variations**  
 220 **in the biofilm under low osmotic condition (B). A.** Wild-type, CRISPR, and *cas operon* knockout strains transformed with  
 221 empty vector, pQE60 (WT60,  $\Delta$ crisprI 60,  $\Delta$ crisprII 60,  $\Delta$ cas op 60, and  $\Delta\Delta$ crisprI crisprII 60), and the complement strains  
 222 ( $\Delta$ crisprI+pcrisprI,  $\Delta$ crisprII+pcrisprII) were cultured in cholesterol coated microcentrifuge tubes in LB media for 96 h at  
 223 37°C, static conditions. **B.** The *S. Typhimurium* strain 14028s wildtype (WT), CRISPR ( $\Delta$ crisprI,  $\Delta$ crisprII, and  $\Delta\Delta$ crisprI  
 224 crisprII) and *cas operon* ( $\Delta$ cas op) knockout strains were cultured in LB without NaCl media for different periods (24 h, 48  
 225 h, and 96 h) at 25°C, static condition. The biofilm formation in all the cases was estimated using a crystal violet staining  
 226 assay. The graphs represent OD<sub>570nm</sub> for each strain, normalized by OD<sub>570nm</sub> of WT. An unpaired t-test was used to  
 227 determine significant differences between the WT and knockout strains. Error bars indicate SD. Statistical significance:  
 228 \* $\leq$  0.05, \*\* $\leq$  0.01, \*\*\* $\leq$  0.001, \*\*\*\* $\leq$  0.0001, ns = not significant. A.U., arbitrary units.

229 strains showed patchy bacterial aggregates (Supplementary figure, Fig. S3). Distinct bacterial cells  
 230 were more evident in  $\Delta$ cas op. Small dome-like structures were observed only in the WT micrograph,  
 231 indicating the formation of the multilayered structure. The biofilm formed by the knockout strains  
 232 displayed clumped cells without any slimy material in their vicinity. Interestingly, a few elongated  
 233 cells (marked in micrograph) were observed in the knockout strains at 24 h (Supplementary figure,  
 234 Fig. S3).

235 SEM analysis of 96 h pellicle biofilm revealed that, in general, the air-exposed side of the pellicle  
 236 biofilm had a dry but smooth mat-like structure composed of dense fibrous networks with tightly  
 237 packed bacterial cells. However, compared to WT biofilm, the biofilms formed by knockout strains  
 238 had thicker ECM coatings and consisted of 'hilly' structures of different sizes (arrow-heads,  
 239 Fig.2A). The liquid-submerged side of the pellicle biofilm was rough, consisting of a dome- and  
 240 valley-like arrangement made up of loosely packed bacterial cells entrapped in EPS. The knockout  
 241 strains also displayed discrete regions with EPS lumps (marked in micrographs) and pronounced  
 242 bacterial density (Fig.2B).

243

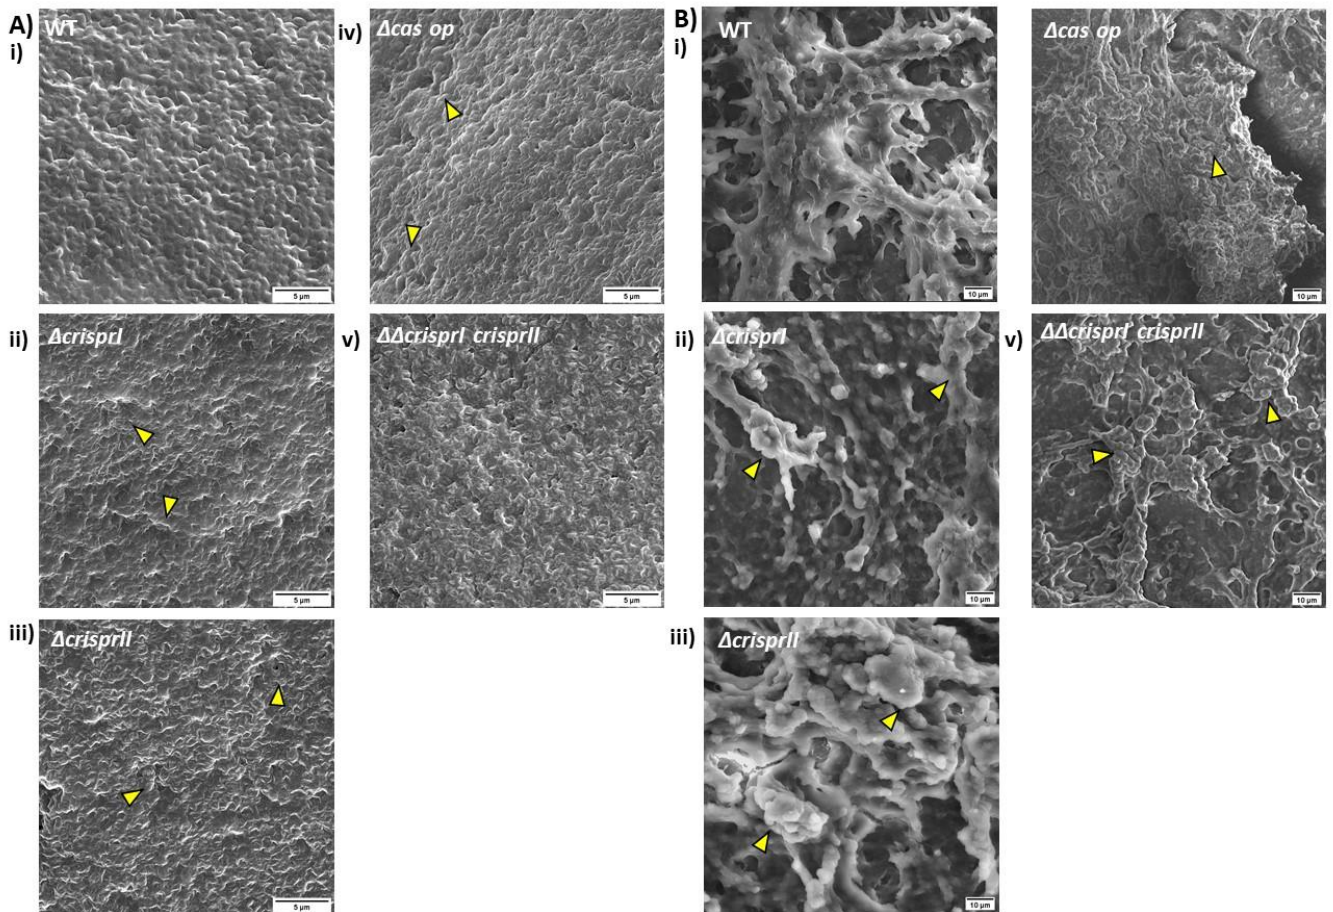

244

245 **Figure 2: Morphology of air-exposed side (A) and liquid-submerged side (B) of pellicle biofilm at 96 h.** The strains were  
246 grown in LB without NaCl media for 96 h, at 25°C, static conditions. The pellicle biofilms formed, fixed using 2.5%  
247 glutaraldehyde, were dehydrated with increasing ethanol concentrations. SEM image analysis depicts the difference in  
248 the pellicle biofilm architecture of CRISPR-Cas knockout ( $\Delta crispri$ ,  $\Delta crisprii$ ,  $\Delta cas\ op.$ , and  $\Delta\Delta crispri\ crisprii$ ) strains, and  
249 that of the wildtype (WT), for both air-exposed side (captured at 10,000x magnification), and liquid-submerged (captured  
250 at 2500x magnification) side of pellicle biofilm. The air-exposed surface of the pellicle biofilm of CRISPR-Cas knockout  
251 strains had denser mat-like ECM. It consisted of "hilly" structures (marked with arrow-heads), indicating more layering of  
252 the biofilm. The liquid-submerged surface of the pellicle biofilm of CRISPR-Cas knockout strains had more EPS lumps  
253 (marked with arrow-heads) than wildtype. Images were scaled to bar.

## 254 **Factors contributing to differential biofilm formation by CRISPR-Cas knockout strains**

255 To understand the knockout strains' temporal variations in biofilm formation, we assessed the  
256 expression of essential biofilm components like flagella, cellulose, LPS, and curli.

### 257 CRISPR-Cas knockout strains show reduced motility and flagellin expression

258 Motility is crucial for forming surface-associated multicellular communities by several bacteria,  
259 including *Salmonella*. It helps in the initial surface colonization during biofilm formation[16]. As the  
260 CRISPR and *cas* deletion mutants showed reduced biofilm formation at 24 h (early time-point), we  
261 assessed their motility using a swarming assay. There was at least 20% reduction in swarming rates  
262 of all the knockout strains compared to WT (Supplementary figure, Fig. S4 and Fig. 3A). The  
263 complementation of  $\Delta crispri$  and  $\Delta crisprii$  with corresponding genes restored the defect in their  
264 motility (Supplementary figure, Fig. S4, and Fig. 3A). We next analyzed the expression of flagellin



265 protein (FliC) for the planktonic and pellicle bacteria. The immunoblot analysis revealed that the FliC  
 266 expression in planktonic bacteria was less for knockout strains than that of WT. However, in the 96  
 267 h pellicle, no FliC expression was observed in all the strains (Fig.3B).

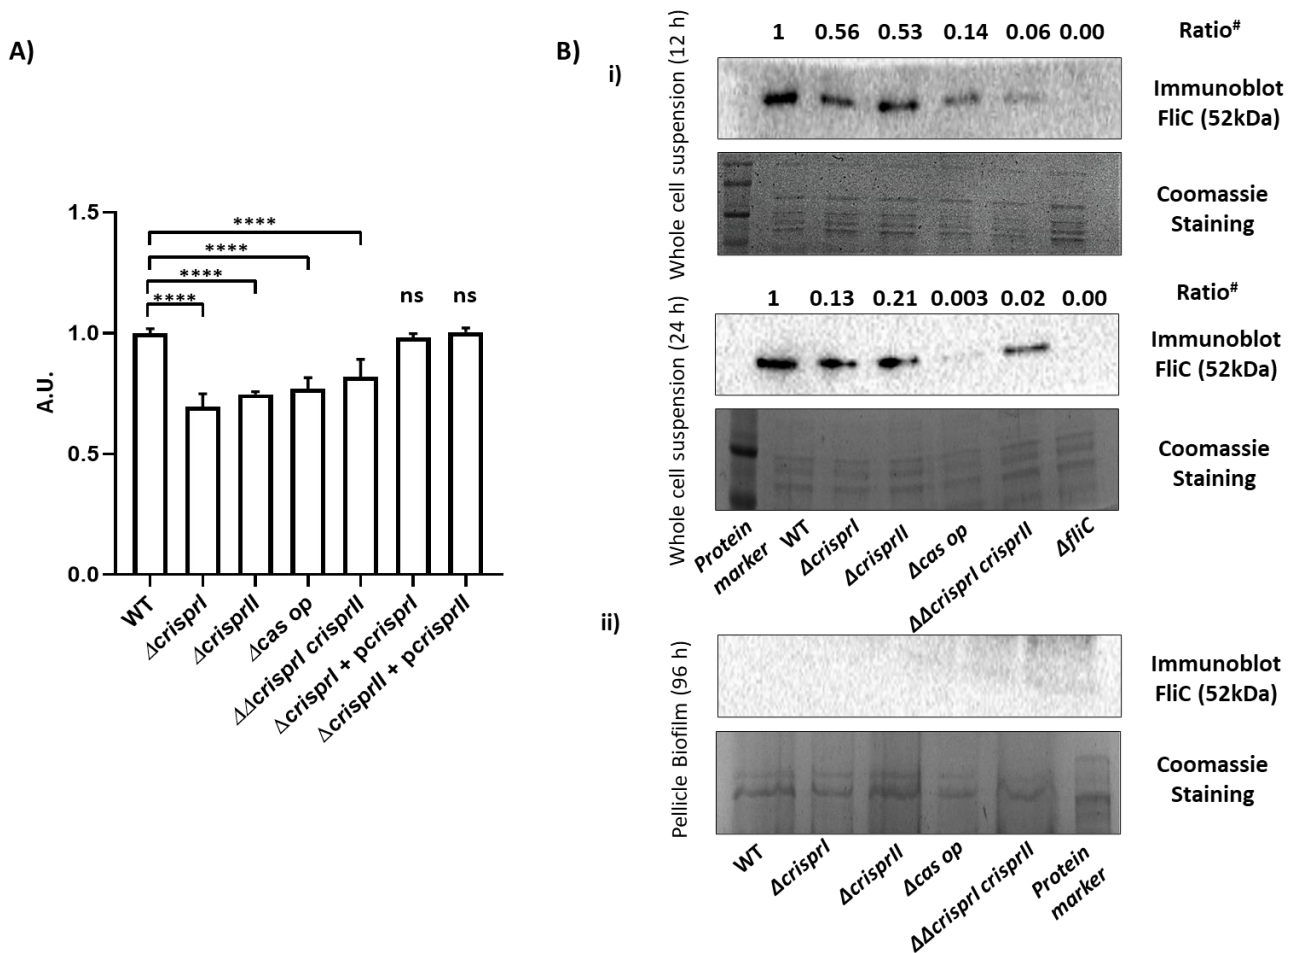

268

269 **Figure 3: Reduced swarming motility (A), and expression of flagellar protein, FliC (B) was observed in the CRISPR-Cas**  
 270 **system knockout strains. A.** Overnight cultures were point inoculated on swarm agar plates and incubated at 37°C for 9  
 271 h. Swarming rate (cm/h) of the wildtype (WT), the knockout strains ( $\Delta$ crisprI,  $\Delta$ crisprII,  $\Delta$ cas op, and  $\Delta\Delta$ crisprI crisprII),  
 272 and the complement strains ( $\Delta$ crisprI + pcrisprI,  $\Delta$ crisprII + pcrisprII) was calculated. The graph represents the swarming  
 273 rate (cm/h) relative to that of WT. **B.** The strains were grown in LB without NaCl media for different periods (12 h, 24 h,  
 274 and 96 h), at 25°C, static conditions. The expression of the flagellar protein in planktonic bacteria (B(i)) at early time  
 275 points (12 h and 24 h), and in pellicle biofilm (B(ii)) at a late time point (96 h) was assessed using western blot analysis  
 276 with antibodies against FliC. Even at higher protein concentration, FliC was not detected in the blot for pellicle sample of  
 277 any strain, indicating repression of FliC expression in the pellicle.  $\Delta$ fliC was used as a negative control. An unpaired t-test  
 278 was used to determine significant differences between the WT and knockout strains. Error bar indicates SD. Statistical  
 279 significance: \* $\leq$  0.05, \*\* $\leq$  0.01, \*\*\* $\leq$  0.001, \*\*\*\* $\leq$  0.0001, ns = not significant. A.U., arbitrary units. # ratio:  
 280 
$$\frac{[FliC \text{ intensity}/\text{coomassie band intensity}]_{\text{strain}}}{[FliC \text{ intensity}/\text{coomassie band intensity}]_{WT}}$$

### 281 Deletion of CRISPR-Cas genes affects the LPS structure

282 The reduction in swarming motility in the knockout strains is not consistent with FliC expression. For  
 283 example, expression of FliC protein was minimum in the  $\Delta\Delta$ crisprI crisprII strain, but its swarming

284 rate was not the lowest. This anomaly could partially be attributed to the variations in the wettability  
285 factor, like LPS that governs the swarming rate. Additionally, the O-antigen of LPS plays a crucial role  
286 in biofilm formation [17], and Gram-negative bacteria modify their LPS while in the biofilm [18]. Thus,  
287 we assayed the LPS profile of all the knockout strains and compared it with that of the WT  
288 (Supplementary figure, Fig. S5). The intensity of the lipid-A band was similar in all the strains, except  
289 for *Δcas op.* and *ΔΔcrisprI crisprII*. O-antigen profile showed variations, where the ladder-like banding  
290 patterns in *ΔcrisprII* and *ΔΔcrisprI crisprII* were of less intensity than other strains. The band  
291 corresponding to very long O-antigen was absent in *ΔcrisprI*, whereas the WT and *Δcas op.* bands  
292 had comparable intensities. The very long O-antigen band intensity was similar for *ΔΔcrisprII* and  
293 *ΔΔcrisprI crisprII* but was less than that of WT. As for the banding pattern of core glycoforms,  
294 *ΔΔcrisprII* and WT were similar to *ΔΔcrisprI crisprII* and *Δcas op.*, respectively. *ΔcrisprI* had a distinct  
295 pattern of core glycoforms.

296 All these observations point to alterations of the O-antigen chain in the knockout strains during  
297 biofilm formation.

#### 298 *The CRISPR-Cas knockout strains show increased pellicle formation due to increased bacterial* 299 *biomass and its respective components*

300 The dry weights of the pellicle biofilms by all the knockout strains were similar to that of the WT at  
301 48 h, whereas it was significantly higher at 96 h (Fig. 4A). The temporal variations in the dry weight  
302 of all the strains were similar to that of the biofilm formation as estimated using crystal-violet assay.  
303 As the dry mass comprises bacterial cells and ECM, we independently assessed the bacterial cell mass  
304 (by assessing viability) and concentration of the ECM components. The resazurin cell viability assay  
305 results show that the knockout strains are more viable than WT (Supplementary figure, Fig. S6A),  
306 hinting at more bacterial mass. We also validated high bacterial abundance within biofilms of  
307 knockout strains using SYTO9 staining. Biofilms of all the knockout strains had higher SYTO9 intensity  
308 than the WT (Supplementary figure, Fig. S6B) suggesting higher bacterial numbers. Further, the  
309 SYTO9: PI ratio was more in the pellicles of the knockout strains, except *Δcas op.*, indicating the  
310 presence of more viable bacteria (Fig.4B and Supplementary figure, Fig. S7B). As per the CLSM Z-  
311 stack images of the pellicle biofilm, the knockout strains had fewer dead cells near the air-exposed  
312 surface than WT (Supplementary figure, Fig S7A). The pellicle biofilm thickness observed by CLSM  
313 were 82 μm, 96 μm, 88 μm, 112 μm and 124 μm for WT, *ΔcrisprI*, *ΔcrisprII*, *Δcas op.* and *ΔΔcrisprI*  
314 *crisprII* respectively.

315 We next estimated the net content of the extracellular polymeric substances like proteins, DNA, and  
316 polysaccharides that comprise the ECM. The pellicle biofilms of all the knockout strains had  
317 significantly higher polysaccharide concentrations than WT (Supplementary figure, Fig. S6C).  
318 Similarly, the protein concentrations were significantly high in the pellicle biofilms of all the knockout  
319 strains except in *ΔΔcrisprI crisprII* (Supplementary figure, Fig. S6D). The DNA content was significantly  
320 higher only in the pellicle biofilm of *ΔcrisprI* and *Δcas op.* (Supplementary figure, Fig. S6E).

321

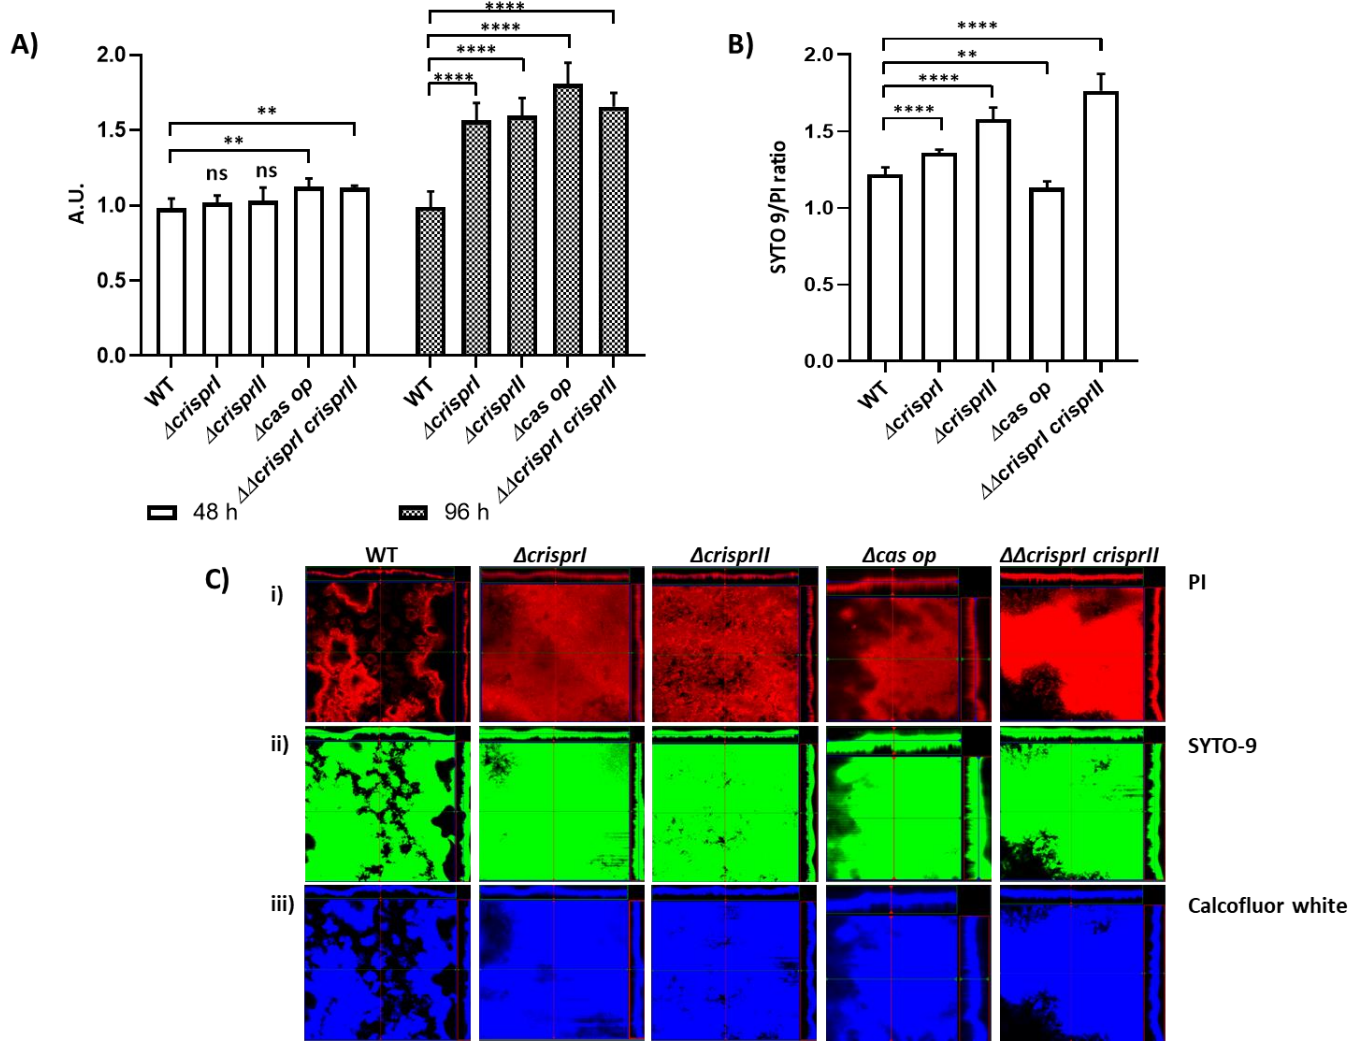

322

323 **Figure 4: The CRISPR- Cas knockout strains had increased bacterial biomass (A), and SYTO 9/ PI ratio(B).** A. The *S.*  
 324 *Typhimurium* strain 14028s wildtype (WT), CRISPR ( $\Delta$ *crisprI*,  $\Delta$ *crisprII*, and  $\Delta\Delta$ *crisprI crisprII*) and *cas operon* ( $\Delta$ *cas op*)  
 325 knockout strains were cultured in LB without NaCl media for different periods (48 h, and 96 h) at 25°C, static condition.  
 326 The biomass of the strains was estimated by quantifying the dry weight of pellicle biofilms harvested post 48 h and 96 h  
 327 incubations. The graph represents the dry pellicle weight (in gms) of each strain normalized by the dry pellicle weight (in  
 328 gms) of WT at respective time points. B-D. The *S.* *Typhimurium* strain 14028s wildtype (WT), CRISPR ( $\Delta$ *crisprI*,  $\Delta$ *crisprII*,  
 329 and  $\Delta\Delta$ *crisprI crisprII*) and *cas operon* ( $\Delta$ *cas op*) knockout strains were cultured in LB without NaCl media for 96 h, at 25°C,  
 330 static condition. The pellicle biofilm formed was stained with SYTO 9, Propidium Iodide (PI), and Calcofluor white for 30  
 331 mins in the dark at RT. B. The graph represents ratio of mean intensity of SYTO 9 to mean intensity of PI, for respective  
 332 strains. C. Orthogonal projections of CLSM images of wildtype and CRISPR- Cas knockout strains, stained with PI (i), SYTO  
 333 9 (ii), and Calcofluor white (iii). An unpaired t-test was used to determine significant differences between the WT and  
 334 knockout strains. Error bars indicate SD. Statistical significance: \* $\leq$  0.05, \*\* $\leq$  0.01, \*\*\* $\leq$  0.001, \*\*\*\* $\leq$  0.0001, ns = not  
 335 significant. A.U., arbitrary units.

336 We further evaluated the expression of individual biofilm components like Curli and cellulose. Curli,  
 337 thin aggregative fimbriae aid surface adhesion and provide cell-cell interaction while framing the  
 338 biofilm architecture [19]. Less Curli production could also be one of the reasons for reduced ring  
 339 biofilm formation by the knockout strains. Thus, we assessed the Curli production using whole-cell  
 340 Congo red (CR) depletion assay for planktonic culture and pellicle biofilm. The CR depletion was less  
 341 for both the planktonic culture (Supplementary figure, Fig. S8A) and pellicle biofilm (Fig.5A) of all the

342 knockout strains, suggesting low levels of Curli protein. The results were further validated using an  
 343 amyloid-specific indicator dye Thioflavin-T (ThT) [20]. The results confirm that the Curli production is  
 344 less in all the four knockout strains (Fig. 5B). The cellulose production in the biofilm pellicle of all the  
 345 strains was estimated by quantifying cellulose dry-weight at 48 h and 96 h. Interestingly, the cellulose  
 346 content in the pellicles of the knockout strains was marginally lesser than that of WT at 48 h, but at  
 347 96 h the cellulose content was considerably higher (Fig.5C). The above-observed results for  
 348 quantitative analysis of cellulose at 96 h were also substantiated by calcofluor binding assay (Fig.5D)  
 349 and CLSM with calcofluor staining (Supplementary figure, Fig. S7C).

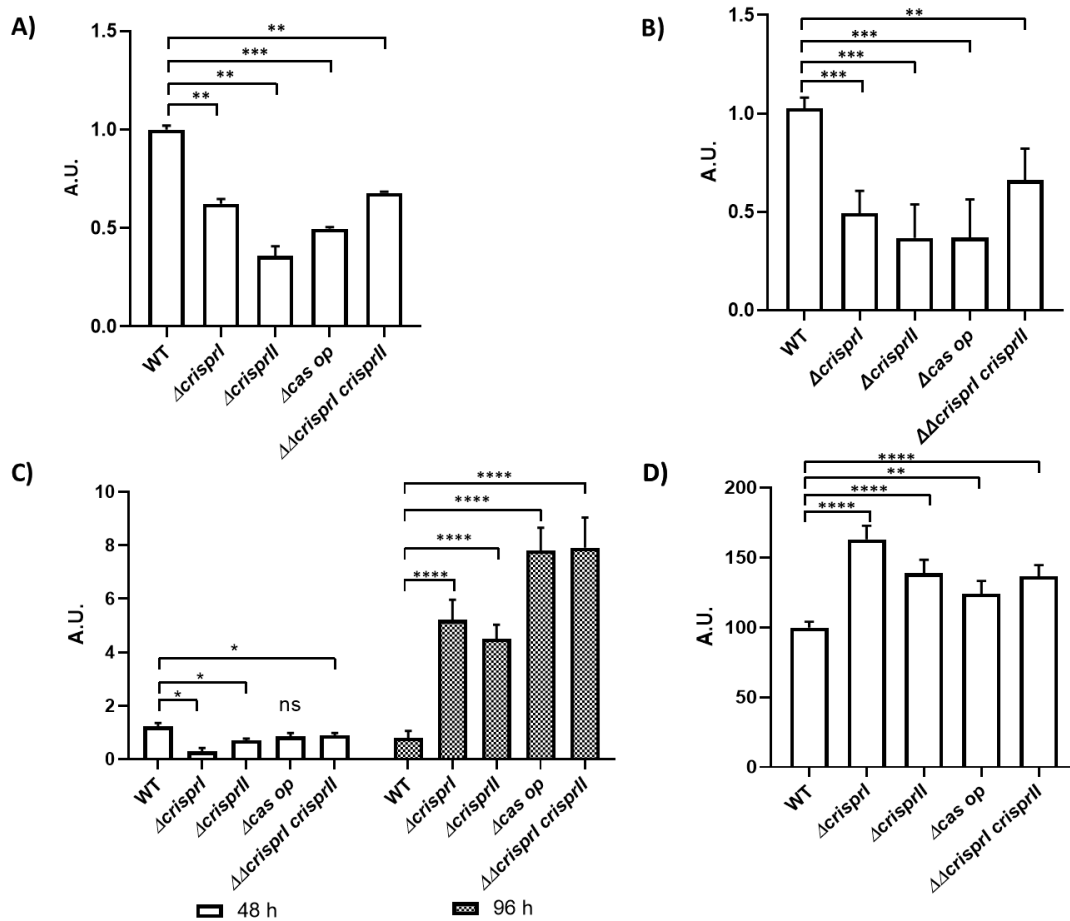

350

351 **Figure 5: Pellicle biofilms of the CRISPR-Cas knockout strains showed variations in the productions of key components**  
 352 **like curli (A & B), and cellulose (C & D).** Curli production in the pellicle biofilms of wildtype, CRISPR, and *cas operon*  
 353 knockout strains was assessed with the help of Congo red depletion (A), and Thioflavin (ThT) Fluorescence intensity (B).  
 354 The *S. Typhimurium* strain 14028s wildtype (WT), CRISPR ( $\Delta$ crisprI,  $\Delta$ crisprII, and  $\Delta\Delta$ crisprI crisprII) and *cas operon* ( $\Delta$ cas  
 355 op) knockout strains were cultured in LB without NaCl media 48 h, at 25°C, static condition. A. Congo red depletion was  
 356 determined by measuring absorbance of bound Congo red at 500 nm. The graph represents normalized absorbance with  
 357 respect to WT. B. Thioflavin (ThT) Fluorescence intensity was determined by measuring absorbance at excitation 440 nm  
 358 and emission 482 nm.  $\Delta$ csgD was used as a negative control. The graph represents intensity readings of each strain,  
 359 normalized by intensity readings of WT. C. Cellulose production in the pellicle biofilms of wildtype, CRISPR, and *cas operon*  
 360 knockout strains was quantitatively assessed by determining the cellulose dry weight in the pellicle biofilm. D. Qualitative  
 361 analysis of amount of cellulose present in the pellicle-biofilm (96 h) was done by measuring the calcofluor bound, at  
 362 excitation of 350 nm and emission 475 nm. The *S. Typhimurium* strain 14028s wildtype (WT), CRISPR ( $\Delta$ crisprI,  $\Delta$ crisprII  
 363 and  $\Delta\Delta$ crisprI crisprII) and *cas operon* ( $\Delta$ cas op.) knockout strains were cultured in LB without NaCl media 96 h, at 25°C,

364 static condition. An unpaired t-test was used to determine significant differences between the WT and knockout strains.  
 365 Error bar indicates SD. Statistical significance: \* $\leq 0.05$ , \*\* $\leq 0.01$ , \*\*\* $\leq 0.001$ , \*\*\*\* $<0.0001$ , ns = not significant. A.U.,  
 366 arbitrary units.

367 Curli content in the pellicle biofilm is related to surface elasticity, thereby providing mechanical  
 368 strength to the biofilm [21]. As Curli protein was lesser in pellicles of knockout strains, we determined  
 369 the pellicle biofilm strength using a glass bead assay [21]. The pellicles of the knockout strains were  
 370 easily disrupted with lesser weight while enduring  $\sim 50\%$  less weight than the WT pellicles could  
 371 sustain (Supplementary figure, Fig. S8C). The results suggest that knockout strains' pellicles are  
 372 weaker due to lesser Curli production.

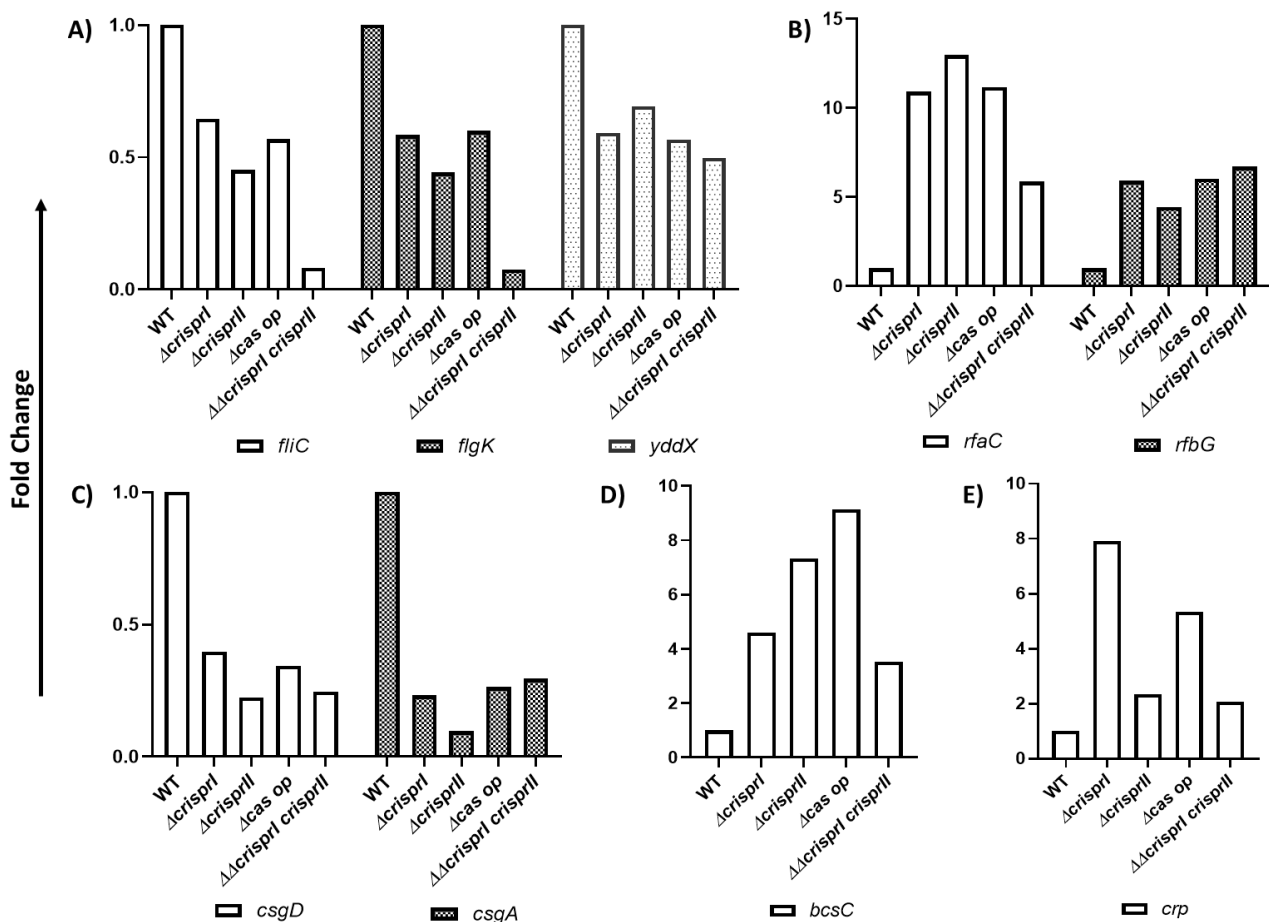

373

374 **Figure 6: CRISPR-Cas system knockout strains showed differences in the expressions of genes associated with flagella**  
 375 **(A), the production of LPS (B), Curli (C), cellulose (D), and cAMP regulated protein (*crp*) (E) when compared to WT.** The  
 376 *S. Typhimurium* strain 14028s wildtype (WT), CRISPR ( $\Delta$ *crisprI*,  $\Delta$ *crisprII* and  $\Delta$ *crisprI crisperII) and *cas operon* ( $\Delta$ *cas op)  
 377 knockout strains were cultured in LB without NaCl media for 24 h, at 25°C, static condition. Total RNA was isolated from  
 378 bacteria using TRIzol reagent as per the manufacturer's instructions. 1  $\mu$ g of RNA was used for cDNA synthesis, followed  
 379 by qRT-PCR. Relative expression of the gene was calculated using the  $2^{-\Delta\Delta Ct}$  method, and normalized to reference gene  
 380 *rpoD*.**

381 **The CRISPR-Cas knockout strains show altered expression of biofilm-related genes**

382 To understand the temporal variations in biofilm formation by the CRISPR-Cas knockout strains, we  
 383 checked the regulation of biofilm-related genes using RT-PCR. We first assessed the expression of

384 genes governing motility, like *fliC* (flagellin subunit), *flgK* (hook protein), *yddX* (biofilm modulation  
385 protein, controlling regulatory pathway of flagellar assembly), and *flgJ* (peptidoglycan hydrolyzing  
386 flagellar protein). All the knockout strains showed reduced expression of these genes (Fig.6A), except  
387 *flgJ* (Supplementary figure, Fig. S9A). Next, to comprehend the observed variations in the LPS profile  
388 of the knockout strains (Supplementary figure, Fig. S5), we analyzed the expression of a few  
389 representative LPS genes within *rfa* (LPS core synthesis) and *rfb* (O-antigen synthesis) gene clusters.  
390 The *rfaC* (lipopolysaccharide heptosyltransferase I), and *rfbG* (DP-glucose 4,6-dehydratase) genes  
391 were upregulated in all the knockout strains (Fig.6B), whereas *rfbI*, coding for core LPS region was  
392 downregulated in all the knockout strains except in  $\Delta\Delta cas\ op$ . (Supplementary figure, Fig. S9B).

393 The *csgA* gene responsible for producing the Curli fibers was downregulated in knockout strains  
394 (Fig.6C). The expression of *csgA* is controlled by the master regulator *csgD*, which too had reduced  
395 expression in the knockout strains (Fig.6C). The expression of *crp* gene encoding for cAMP regulating  
396 protein, a *csgD* repressor [22], was high in the knockout strains (Fig.6E). *CsgD* also controls the  
397 expression of cellulose synthesis genes (*bcsABZC*). Notably, the expression of *bcsA* (cellulose  
398 synthase catalytic subunit A) was only marginally low in the knockout strains (Supplementary figure,  
399 Fig. S9C) but *bcsC* (subunit involved in the export of cellulose to extracellular matrix [23]) was 2-fold  
400 upregulated (Fig.6D). The observed results hint at *csgD* independent regulation [24] of *bcsC* in the  
401 knockout strains.

402

## Discussion

403 Biofilm formation in *Salmonella* is finely regulated, helping the bacteria to sustain various  
404 environmental insults while aiding in its persistence within and outside the host [25]. Recently, the  
405 CRISPR-Cas system has been implicated to play a role in endogenous gene regulation [5] and biofilm  
406 formation in various bacteria, including *Salmonella* [6], [7]. Cui *et al.* demonstrated that Cas3  
407 positively regulates biofilm formation in *S. enterica* subsp. *enterica* ser. Enteritidis [6]. However, our  
408 study determined that the Cas proteins negatively regulate biofilm formation in *S. Typhimurium*. This  
409 discrepancy in the results could be related to the differences in CRISPR spacers within these serovars  
410 [26] or differences in *cas* gene expression observed in both studies. The *cas* genes were upregulated  
411 in the *cas3* mutant strain of serovar Enteritidis. This implies that the increased expression of Cas  
412 proteins (except Cas3) could have suppressed biofilm in serovar Enteritidis. While in our study, the  
413 entire operon was deleted, thereby no *cas* gene expression and hence enhanced biofilm formation.  
414 Furthermore, our study also demonstrated that CRISPR-I and CRISPR-II arrays negatively regulated  
415 pellicle biofilm formation in *S. Typhimurium*. Correspondingly, a study by Medina *et al.* suggests that  
416 the CRISPR-Cas system suppresses the surface-biofilm formation (at 24 h) in *S. Typhi* [7]. Intriguingly,  
417 we found that the CRISPR-Cas system of *S. Typhimurium* positively regulates surface-biofilm while  
418 repressing pellicle-biofilm. We speculate that the difference in our data on surface-biofilm and that  
419 of Medina *et al.* could be because serovar Typhi and Typhimurium differ in arrangement and  
420 sequence of *cas* genes, as well as in the CRISPR-I array [6], [7]. Could the differential evolution of the  
421 CRISPR-Cas system possibly be the reason for the two serovars' distinct biofilm phenotypes? Or could  
422 it be due to differences in the CRISPR spacers? These deductions need further exploration.

423 We next explored the underlying mechanisms of biofilm regulation by the CRISPR-Cas system. Biofilm  
424 formation is a complex mechanism requiring coordination between multiple factors and processes.  
425 Flagellar motility is essential for cell-cell adhesion and forming microcolonies at the initial stages [16].  
426 Our study showed that the CRISPR-Cas knockout strains are less motile, thereby explaining lesser  
427 biofilm formation at 24 h by CRISPR-Cas knockout strains. Nevertheless, as the biofilm progresses,  
428 the requirement of flagella becomes negligible, and its expression is repressed [27]. In accordance,  
429 we found that FliC expression was absent in pellicle biofilms of all the strains at 96 h. The FliC subunit  
430 is also crucial for cholesterol binding and biofilm development on gallstones [28], [29]. The decreased  
431 biofilm formation by the CRISPR-Cas knockout strains in tube biofilm assay could be attributed to  
432 decreased FliC expression. The reduction in FliC expression is also reflected in reduced swarming  
433 motility of the knockout strains, but it is not proportionate to the observed trend in FliC expression.  
434 This disparity could be due to variation in the LPS that acts as a wettability factor favoring swarming  
435 while inhibiting biofilm formation [30]. Interestingly, our study displayed such a relation; all the  
436 knockout strains showed reduced swarming but enhanced biofilm formation. Further, despite  
437 showing minimal FliC expression amongst all knockout strains,  $\Delta\Delta\text{crisprI crisprII}$  had considerable  
438 swarming motility.

439 The CRISPR-Cas knockout strains had altered LPS profile with a difference in the LPS gene expression.  
440 The *rfaC* (part of *rfa* gene cluster: responsible for LPS core synthesis), and *rfbG* (part of *rfb* gene  
441 cluster: responsible for O-antigen synthesis) genes were upregulated in the knockout strains. At the  
442 same time, *rfbI* was significantly downregulated only in  $\Delta\Delta\text{crisprI crisprII}$ . Besides, studies suggest the  
443 plausible conversion of LPS to exopolysaccharides that contribute to external slime [31]. The  
444 increased exopolysaccharides in the pellicle of CRISPR-Cas knockout strains may also be attributed  
445 to this, along with the observed increase in cellulose production. The pellicles formed by the CRISPR-  
446 Cas knockout strains are thicker (owing to more bacterial mass and EPS secretion[16]) than that of  
447 the WT, confirming the formation of multilayered pellicle biofilms, as evidenced by SEM and CLSM  
448 analysis. As per SEM analysis, the air-exposed pellicle biofilm architecture of  $\Delta\text{crisprII}$  and  $\Delta\Delta\text{crisprI}$   
449  $\text{crisprII}$  appears similar, indicating that *crisprII* could act upstream of *crisprI*. This observation is  
450 seconded by our LPS profiling data, where the banding pattern of  $\Delta\text{crisprII}$  and  $\Delta\Delta\text{crisprI crisprII}$  are  
451 similar.

452 The EPS overproducing variants reportedly have rough and wrinkled biofilm [32]. This supports our  
453 observation that the CRISPR-Cas knockout strains overproduce EPS and display intricate wrinkled  
454 patterns in the pellicle biofilm. These wrinkled patterns appeared fractal-like (Supplementary figure,  
455 Fig. S9B), as reported in *Vibrio cholerae* [33]. Such morphology could aid bacterial growth of the  
456 CRISPR-Cas knockout strains due to the increased surface area that presumably facilitates the  
457 nutrient supply [33]. Consistently, the bacterial mass was higher in the knockout strains with more  
458 viable bacteria, as evidenced by the resazurin assay and SYTO9-PI staining.

459 The ECM scaffold of pellicle biofilm majorly comprises cellulose and Curli that define the long-range  
460 and short-range interactions, respectively, thereby providing mechanical integrity[34]. The pellicle  
461 biofilms of CRISPR-Cas knockout strains have higher cellulose but lesser curli content. This could  
462 probably be the reason for the weaker pellicle biofilm of the CRISPR-Cas knockout strains that quickly

463 collapsed in the glass bead assay. Further, high cellulose in the pellicles of the CRISPR-Cas knockout  
 464 strains means high water retention that can hamper intermolecular forces in the matrix by  
 465 decreasing the hydrogen bond interactions. Additionally, less Curli could lead to low tensile strength  
 466 of the pellicle biofilm of the CRISPR-Cas knockout strains. Higher cellulose and lesser Curli could also  
 467 explain reduced surface-biofilm (ring biofilm at 24 and 96 h) in the CRISPR-Cas knockout strains.  
 468 High cellulose may inhibit the formation of surface-biofilm as it can coat the curli fibers required for  
 469 surface attachment[35]. Though the cellulose content was high in pellicles of the CRISPR-Cas  
 470 knockout strains, the expression of cellulose synthase, *bcsA*, was unaltered; indeed it was marginally  
 471 low in all the knockout strains. Besides, the intracellular cellulose concentration in the CRISPR-Cas  
 472 knockout strains was less than the WT (as estimated using anthrone assay, supplementary figure,  
 473 Fig. S8B). This could be explained through the upregulated *bcsC*, encoding an exporter of cellulose  
 474 subunits that could export cellulose units to the extracellular milieu[23]. We hypothesized that this  
 475 secreted cellulose is quickly incorporated in the pellicle, increasing cellulose content in the pellicles  
 476 of the knockout strains.

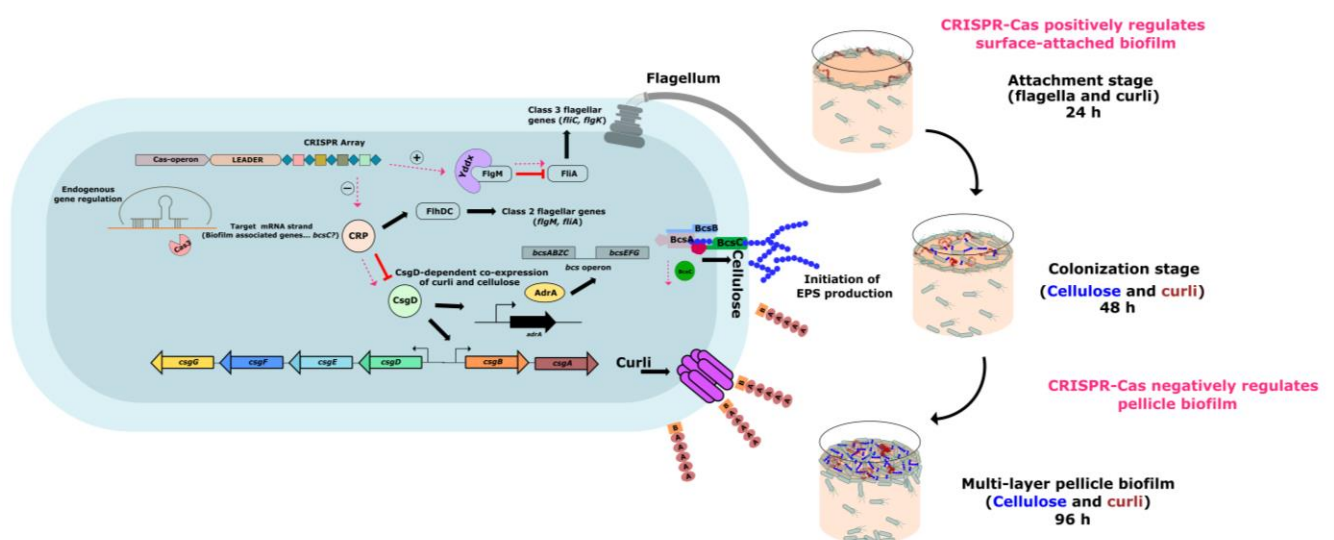

477

478 **Figure 7. Differential regulation of surface-attached and pellicle-biofilm formation in *Salmonella Typhimurium* by the**  
 479 **CRISPR-Cas system.**

480 The CRISPR-Cas system differentially regulates surface-attached and pellicle-biofilm formation via modulation (pink  
 481 dotted lines) of biofilm-associated genes (*crp*, *yddx*, and *bcsC*). CRP acts on FlhDC, which further governs the expression  
 482 of class 2 flagellar genes (*flgM* and *fliA*). FlgM inhibits FliA mediated expression of class 3 flagellar genes. Yddx  
 483 relieves the inhibition of FliA by binding to FlgM, thereby inactivating it. We propose that CRISPR-Cas positively regulates *yddx*,  
 484 whereby it sequesters FlgM and upregulates the expression of the flagellar subunit. CRP also inhibits CsgD, which in turn  
 485 governs the production of Curli and cellulose. Our study suggests that the CRISPR-Cas system mediates the expression of  
 486 CsgD by suppressing *crp* expression, and independently represses the expression of cellulose exporter, *BcsC*. Taken  
 487 together, the CRISPR-Cas system enhances flagella and Curli production and hence surface-attached biofilm formation.  
 488 Additionally, it suppresses cellulose export to the extracellular milieu, thus negatively regulating pellicle biofilm  
 489 formation.

490



491 Apart from reduced expression of *csgA* and marginal repression of *bcsA*, we found that *csgD*, the  
492 activator of *csgBAC* and *bcsABZC* was also downregulated in the knockout strains. In order to gain  
493 mechanistic insight into the CRISPR-Cas mediated biofilm regulation, we checked the expression of  
494 the further upstream regulator, CRP. CRP negatively regulates *csgD* in *S. Typhimurium*[36]. The  
495 expression of *crp* was significantly upregulated in the knockout strains, which explains the repression  
496 of *csg* and *bcsA*. The conflicting upregulation of *bcsC*, the last gene of *bcsABZC*, could be through the  
497 crRNA binding to the *bcsC* gene. The CRISPR spacers (spacer 11, 15, and 19 of CRISPR1 array and  
498 spacer 18 and 26 of CRISPR2 array) show partial complementarity to the *bcsC* gene (Supplementary  
499 figure, Fig. S11) and hence could regulate the expression of *bcsC*. CRP also activates *flhDC*, a flagellar  
500 master operon[37] that further activates the expression of class 2 genes, including *fliA*. The *fliA* gene  
501 encodes the flagellar-specific transcription factor  $\sigma^{28}$ , which directs the expression of class 3 genes  
502 like *fliC* and *flgK*. Before the assembly of hook-basal body structure, it is held inactive by the anti- $\sigma^{28}$   
503 factor, *flgM*[38]. YddX, a BDM homolog (Biofilm-dependent modulation protein) interacts with FlgM  
504 to repress its function as an anti- $\sigma^{28}$  factor[39]. Our study observed a significant downregulation of  
505 *yddX* in the knockout strains. Low YddX would mean that FlgM would sequester  $\sigma^{28}$ , inhibiting the  
506 transcription and expression of class 3 genes, including *fliC* and *flgK*. This explains the impaired  
507 motility of the CRISPR-Cas knockout strains.

508 In a nutshell, CRISPR-Cas system facilitates surface-attached biofilm formation while repressing the  
509 pellicle biofilms by acting on different biofilm regulators. The mechanism is summarized in Fig. 7.

510 **Conflicts of Interest:** The authors declare no conflict of interest.

511 **Acknowledgments:** This work was supported by the Department of Science and Technology, Science  
512 and Engineering Research Board (Grant No. ECR\_2017\_002053) to SAM.

513

## 514 References

515

- 516 [1] R. Pinilla-Redondo *et al.*, "Discovery of multiple anti-CRISPRs highlights anti-defense gene clustering  
517 in mobile genetic elements," *Nature Communications*, vol. 11, no. 1, Dec. 2020, doi: 10.1038/s41467-  
518 020-19415-3.
- 519 [2] F. Hille and E. Charpentier, "CRISPR-cas: Biology, mechanisms and relevance," *Philosophical*  
520 *Transactions of the Royal Society B: Biological Sciences*, vol. 371, no. 1707. Royal Society of London,  
521 Nov. 01, 2016. doi: 10.1098/rstb.2015.0496.
- 522 [3] T. R. Sampson and D. S. Weiss, "CRISPR-Cas systems: new players in gene regulation and bacterial  
523 physiology," *Front Cell Infect Microbiol*, vol. 4, p. 37, 2014, doi: 10.3389/fcimb.2014.00037.
- 524 [4] N. Shariat, R. E. Timme, J. B. Pettengill, R. Barrangou, and E. G. Dudley, "Characterization and  
525 evolution of Salmonella CRISPR-Cas systems," *Microbiology*, vol. 161, no. 2, pp. 374–386, 2015, doi:  
526 10.1099/mic.0.000005.
- 527 [5] B. Bozic, J. Repac, and M. Djordjevic, "Endogenous Gene Regulation as a Predicted Main Function of  
528 Type I-E CRISPR/Cas System in *E. coli*," *Molecules*, vol. 24, no. 4, 2019, doi:  
529 10.3390/molecules24040784.

- 530 [6] L. Cui *et al.*, "CRISPR-cas3 of Salmonella Upregulates Bacterial Biofilm Formation and Virulence to  
531 Host Cells by Targeting Quorum-Sensing Systems," *Pathogens*, vol. 9, no. 1, 2020, doi:  
532 10.3390/pathogens9010053.
- 533 [7] L. Medina-Aparicio *et al.*, "The CRISPR-Cas System Is Involved in OmpR Genetic Regulation for Outer  
534 Membrane Protein Synthesis in Salmonella Typhi," *Front Microbiol*, vol. 12, p. 657404, 2021, doi:  
535 10.3389/fmicb.2021.657404.
- 536 [8] World Health Organization (WHO), "Salmonella (non-typhoidal)," Feb. 20, 2018.  
537 [https://www.who.int/news-room/fact-sheets/detail/salmonella-\(non-typhoidal\)](https://www.who.int/news-room/fact-sheets/detail/salmonella-(non-typhoidal))
- 538 [9] World Health Organization (WHO), "Typhoid," Jan. 31, 2018. [https://www.who.int/news-room/fact-](https://www.who.int/news-room/fact-sheets/detail/typhoid)  
539 [sheets/detail/typhoid](https://www.who.int/news-room/fact-sheets/detail/typhoid)
- 540 [10] R. W. Crawford, R. Rosales-Reyes, M. de la L. Ramírez-Aguilar, O. Chapa-Azuela, C. Alpuche-Aranda,  
541 and J. S. Gunn, "Gallstones play a significant role in Salmonella spp. gallbladder colonization and  
542 carriage," *Proceedings of the National Academy of Sciences*, vol. 107, no. 9, pp. 4353–4358, Mar.  
543 2010, doi: 10.1073/PNAS.1000862107.
- 544 [11] C. Silva, E. Calva, and S. Maloy, "One Health and Food-Borne Disease: Salmonella Transmission  
545 between Humans, Animals, and Plants," *Microbiology Spectrum*, vol. 2, no. 1, Jan. 2014, doi:  
546 10.1128/microbiolspec.oh-0020-2013.
- 547 [12] C. M. Parry, T. T. Hien, G. Dougan, N. J. White, and J. J. Farrar, "Typhoid Fever," *New England Journal*  
548 *of Medicine*, vol. 347, no. 22, pp. 1770–1782, 2002, doi: 10.1056/NEJMra020201.
- 549 [13] "WORLD HEALTH ORGANIZATION Geneva ORGANISATION MONDIALE DE LA SANTÉ Genève Typhoid  
550 vaccines: WHO position paper," 2008.
- 551 [14] K. A. Datsenko and B. L. Wanner, "One-step inactivation of chromosomal genes in Escherichia coli K-  
552 12 using PCR products," 2000. [Online]. Available: [www.pnas.org/cgi/doi/10.1073/pnas.120163297](http://www.pnas.org/cgi/doi/10.1073/pnas.120163297)
- 553 [15] F. Wang, L. Deng, F. Huang, Z. Wang, Q. Lu, and C. Xu, "Flagellar Motility Is Critical for Salmonella  
554 enterica Serovar Typhimurium Biofilm Development," *Front Microbiol*, vol. 11, p. 1695, 2020, doi:  
555 10.3389/fmicb.2020.01695.
- 556 [16] D. Peng, "Biofilm Formation of Salmonella," in *Microbial Biofilms - Importance and Applications*,  
557 InTech, 2016. doi: 10.5772/62905.
- 558 [17] R. F. Maldonado, I. Sa-Correia, and M. A. Valvano, "Lipopolysaccharide modification in Gram-negative  
559 bacteria during chronic infection," *FEMS Microbiol Rev*, vol. 40, no. 4, pp. 480–493, 2016, doi:  
560 10.1093/femsre/fuw007.
- 561 [18] C. Reichhardt *et al.*, "Congo Red Interactions with Curli-Producing E. coli and Native Curli Amyloid  
562 Fibers," *PLoS One*, vol. 10, no. 10, p. e0140388, 2015, doi: 10.1371/journal.pone.0140388.
- 563 [19] S. Perov *et al.*, "Structural insights into curli CsgA cross- $\beta$  fibril architecture inspire repurposing of  
564 anti-amyloid compounds as anti-biofilm agents," *PLoS Pathogens*, vol. 15, no. 8, 2019, doi:  
565 10.1371/journal.ppat.1007978.
- 566 [20] C. Wu, J. Y. Lim, G. G. Fuller, and L. Cegelski, "Quantitative analysis of amyloid-integrated biofilms  
567 formed by uropathogenic escherichia coli at the air-liquid interface," *Biophysical Journal*, vol. 103, no.  
568 3, pp. 464–471, Aug. 2012, doi: 10.1016/j.bpj.2012.06.049.

- 569 [21] C. S. Srinandan, M. Elango, D. P. Gnanadhas, and D. Chakravortty, "Infiltration of matrix-non-  
570 producers weakens the salmonella biofilm and impairs its antimicrobial tolerance and pathogenicity,"  
571 *Frontiers in Microbiology*, vol. 6, no. DEC, 2015, doi: 10.3389/fmicb.2015.01468.
- 572 [22] C. Liu, D. Sun, J. Zhu, J. Liu, and W. Liu, "The Regulation of Bacterial Biofilm Formation by cAMP-CRP:  
573 A Mini-Review," *Front Microbiol*, vol. 11, p. 802, 2020, doi: 10.3389/fmicb.2020.00802.
- 574 [23] W. Abidi, L. Torres-Sánchez, A. Siroy, and P. V. Krasteva, "Weaving of bacterial cellulose by the Bcs  
575 secretion systems," *FEMS Microbiology Reviews*, Oct. 2021, doi: 10.1093/femsre/fuab051.
- 576 [24] S. da Re and J. M. Ghigo, "A CsgD-independent pathway for cellulose production and biofilm  
577 formation in *Escherichia coli*," *Journal of Bacteriology*, vol. 188, no. 8, pp. 3073–3087, Apr. 2006, doi:  
578 10.1128/JB.188.8.3073-3087.2006.
- 579 [25] H. Steenackers, K. Hermans, J. Vanderleyden, and S. C. J. de Keersmaecker, "Salmonella biofilms: An  
580 overview on occurrence, structure, regulation and eradication," *Food Research International*, vol. 45,  
581 no. 2, pp. 502–531, 2012, doi: 10.1016/j.foodres.2011.01.038.
- 582 [26] S. K. Kushwaha, N. L. S. Bhavesh, B. Abdella, C. Lahiri, and S. A. Marathe, "The phylogenomics of  
583 CRISPR-Cas system and revelation of its features in *Salmonella*," *Sci Rep*, vol. 10, no. 1, p. 21156,  
584 2020, doi: 10.1038/s41598-020-77890-6.
- 585 [27] C. Hung *et al.*, "Escherichia coli biofilms have an organized and complex extracellular matrix  
586 structure," *mBio*, vol. 4, no. 5, pp. e00645-13, 2013, doi: 10.1128/mBio.00645-13.
- 587 [28] A. M. Prouty and J. S. Gunn, "Comparative analysis of *Salmonella enterica* serovar Typhimurium  
588 biofilm formation on gallstones and on glass," *Infect Immun*, vol. 71, no. 12, pp. 7154–7158, 2003,  
589 doi: 10.1128/IAI.71.12.7154-7158.2003.
- 590 [29] R. W. Crawford, K. E. Reeve, and J. S. Gunn, "Flagellated but not hyperfimbriated *Salmonella enterica*  
591 serovar Typhimurium attaches to and forms biofilms on cholesterol-coated surfaces," *J Bacteriol*, vol.  
592 192, no. 12, pp. 2981–2990, 2010, doi: 10.1128/JB.01620-09.
- 593 [30] J. R. Mireles 2nd, A. Toguchi, and R. M. Harshey, "Salmonella enterica serovar typhimurium swarming  
594 mutants with altered biofilm-forming abilities: surfactin inhibits biofilm formation," *J Bacteriol*, vol.  
595 183, no. 20, pp. 5848–5854, 2001, doi: 10.1128/JB.183.20.5848-5854.2001.
- 596 [31] A. Toguchi, M. Siano, M. Burkart, and R. M. Harshey, "Genetics of Swarming Motility in *Salmonella*  
597 enterica Serovar Typhimurium: Critical Role for Lipopolysaccharide," 2000. [Online]. Available:  
598 [www.genome.wustl.edu/gsc/](http://www.genome.wustl.edu/gsc/)
- 599 [32] D. H. Limoli, C. J. Jones, and D. J. Wozniak, "Bacterial Extracellular Polysaccharides in Biofilm  
600 Formation and Function," *Microbiology Spectrum*, vol. 3, no. 3, Jun. 2015, doi:  
601 10.1128/microbiolspec.mb-0011-2014.
- 602 [33] B. Qin, C. Fei, B. Wang, H. A. Stone, N. S. Wingreen, and B. L. Bassler, "Hierarchical transitions and  
603 fractal wrinkling drive bacterial pellicle morphogenesis," *MICROBIOLOGY BIOPHYSICS AND*  
604 *COMPUTATIONAL BIOLOGY*, vol. 118, 2021, doi: 10.1073/pnas.2023504118/-/DCSupplemental.
- 605 [34] A. P. White, D. L. Gibson, W. Kim, W. W. Kay, and M. G. Surette, "Thin aggregative fimbriae and  
606 cellulose enhance long-term survival and persistence of *Salmonella*," *Journal of Bacteriology*, vol. 188,  
607 no. 9, pp. 3219–3227, May 2006, doi: 10.1128/JB.188.9.3219-3227.2006.

- 608 [35] L. Gualdi, L. Tagliabue, S. Bertagnoli, T. Ieranò, C. de Castro, and P. Landini, "Cellulose modulates  
609 biofilm formation by counteracting curli-mediated colonization of solid surfaces in *Escherichia coli*,"  
610 *Microbiology*, vol. 154, no. 7, pp. 2017–2024, 2008, doi: 10.1099/mic.0.2008/018093-0.
- 611 [36] S. Paytubi, C. Cansado, C. Madrid, and C. Balsalobre, "Nutrient composition promotes switching  
612 between pellicle and bottom biofilm in *Salmonella*," *Frontiers in Microbiology*, vol. 8, no. NOV, Nov.  
613 2017, doi: 10.3389/fmicb.2017.02160.
- 614 [37] O. Soutourina *et al.*, "Multiple Control of Flagellum Biosynthesis in *Escherichia coli*: Role of H-NS  
615 Protein and the Cyclic AMP-Catabolite Activator Protein Complex in Transcription of the *flhDC* Master  
616 Operon," 1999. [Online]. Available: <https://journals.asm.org/journal/jb>
- 617 [38] J. Frye *et al.*, "Identification of new flagellar genes of *Salmonella enterica* serovar typhimurium,"  
618 *Journal of Bacteriology*, vol. 188, no. 6, pp. 2233–2243, Mar. 2006, doi: 10.1128/JB.188.6.2233-  
619 2243.2006.
- 620 [39] J. Lee, D. J. Kim, J. H. Yeom, and K. Lee, "Bdm-Mediated Regulation of Flagellar Biogenesis in  
621 *Escherichia coli* and *Salmonella enterica* Serovar Typhimurium," *Curr Microbiol*, vol. 74, no. 9, pp.  
622 1015–1020, 2017, doi: 10.1007/s00284-017-1270-6.

623

624

625

626

627

628

629

630

631

632

633

634

635

636

637

638

639

640

641 **Supplementary information**

642

643 **Material and Methods**

644 **Analyzing Lipopolysaccharide (LPS) profiles**

645 LPS lysis buffer (2 mL of 20% SDS, 800  $\mu$ L  $\beta$ -Mercaptoethanol, 200  $\mu$ L bromophenol, 2 mL glycerol, 15  
646 mL of 1M Tris-HCl) was added to the pellicle biofilms and were rinsed twice with distilled water. The  
647 samples were then lysed using TissueLyser LT (QIAGEN, Germany) at 50 Hz for 10 mins. The lysates  
648 were heated at 100°C, 10 mins followed by DNase (1  $\mu$ g/ $\mu$ L), RNase (20  $\mu$ g/ $\mu$ L), and Proteinase-K (20  
649  $\mu$ g/ $\mu$ L) treatment. Crude LPS thus obtained was resolved using SDS–polyacrylamide gel electrophoresis  
650 (SDS-PAGE) with 15% separating gel. The LPS profile was detected using ProteoSilver Silver stain Kit  
651 (SIGMA-ALDRICH, USA).

652 **Determining Pellicle Strength**

653 The strains were cultured in LB without NaCl media for 96 h, at 25°C, static condition. The pellicle  
654 biofilm strength was determined by addition of glass beads (1 mm, HiMedia) using a tweezer until  
655 disruption (collapse of pellicle to the bottom). The weight of glass beads that collapsed the pellicle  
656 was recorded.

657 **Quantification of extracellular matrix (ECM) components**

658 The 96 h pellicle biofilms were washed with sterile water and sonicated on ice, 15 kHz for 30 secs. The  
659 samples were centrifuged and supernant was used for the analysis. The DNA and protein  
660 concentrations in the supernatants of each sample were estimated spectrophotometrically using  
661 BioSpectrometer<sup>®</sup> basic (Eppendorf, Germany). The exopolysaccharides were quantified by the phenol-  
662 sulphuric acid method[1] followed by absorbance at 490 nm.

663

664

665

666

667

668

669

670

671

672

673

674

675

676

677

**Supplementary Table 1: Bacterial strains used in this study**

| Bacterial Strain                                       | Genotype and Characteristics                                                                       | Source/ref                                                                        |
|--------------------------------------------------------|----------------------------------------------------------------------------------------------------|-----------------------------------------------------------------------------------|
| <i>Salmonella enterica</i> serovars Typhimurium 14028s | WT 14028s                                                                                          | A kind gift from Prof. Dipshikha Chakravortty, Indian Institute of Science, India |
| $\Delta$ <i>crisprI</i>                                | WT 14028s $\Delta$ <i>crisprI</i> :: Chl (Chl')                                                    | This study                                                                        |
| $\Delta$ <i>crisprII</i>                               | WT 14028s $\Delta$ <i>crisprII</i> :: Chl (Chl')                                                   | This study                                                                        |
| $\Delta$ <i>cas op</i>                                 | WT 14028s $\Delta$ <i>cas operon</i> :: Chl (Chl')                                                 | This study                                                                        |
| $\Delta\Delta$ <i>crisprI crisprII</i>                 | WT 14028s $\Delta$ <i>crisprI</i> :: Kan : $\Delta$ <i>crisprI</i> ::Chl (Kan <sup>r</sup> , Chl') | This study                                                                        |
| $\Delta$ <i>fliC</i>                                   | WT 14028s $\Delta$ <i>fliC</i> ::Kan (Kan <sup>r</sup> )                                           | Marathe <i>et al.</i> , 2016                                                      |
| $\Delta$ <i>csgD</i>                                   | WT 14028s <i>csgD</i> : : Chl (Chl')                                                               | A kind gift from Prof. Dipshikha Chakravortty, Indian Institute of Science, India |
| WT60                                                   | WT 14028s transformed with empty pQE60 vector                                                      | This study                                                                        |
| $\Delta$ <i>crisprI</i> 60                             | $\Delta$ <i>crisprI</i> transformed with empty pQE60 vector                                        | This study                                                                        |
| $\Delta$ <i>crisprII</i> 60                            | $\Delta$ <i>crisprII</i> transformed with empty pQE60 vector                                       | This study                                                                        |
| $\Delta$ <i>cas op</i> 60                              | $\Delta$ <i>cas op</i> transformed with empty pQE60 vector                                         | This study                                                                        |
| $\Delta\Delta$ <i>crisprI crisprII</i> 60              | $\Delta\Delta$ <i>crisprI crisprII</i> transformed with empty pQE60 vector                         | This study                                                                        |
| $\Delta$ <i>crisprI</i> + <i>p</i> <i>crisprI</i>      | $\Delta$ <i>crisprI</i> complemented with functional CRISPR I array cloned in pQE60                | This study                                                                        |
| $\Delta$ <i>crisprII</i> + <i>p</i> <i>crisprII</i>    | $\Delta$ <i>crisprII</i> complemented with functional CRISPR II array cloned in pQE60              | This study                                                                        |

678

679

680

681

682

683

684

685

686

**Supplementary Table 2: Primers used in this study**

| Sl. No. | Primer Name                         | Nucleotide Sequence                                                   |
|---------|-------------------------------------|-----------------------------------------------------------------------|
| 1       | <i>crispr1</i> Knockout Forward     | 5' GAGCTGGCGAAGGCCGAAAAACGTCCTGATATGCTGGTGGTGTAGGCTGGAGCTGCTTCG<br>3' |
| 2       | <i>crispr1</i> Knockout Reverse     | 5' AAATATATAGTTTTAGTGTGTTCCCGCGCCAGCGGGGCATATGAATATCCTCCTTA 3'        |
| 3       | <i>crispr1</i> confirmatory Forward | 5' CGGATAATGCTGCCGTTGGT 3'                                            |
| 4       | <i>crispr2</i> Knockout Forward     | 5' CTGCCATTACTGGTACACAGATTATGATTATGCAACGGCTGTGTAGGCTGGAGCTGCTTCG 3'   |
| 5       | <i>crispr2</i> Knockout Reverse     | 5' GCCTGCCGATGCCGTCTGTGACTCATCCATTACCTTGC CATATGAATATCCTCCTTA 3'      |
| 6       | <i>crispr2</i> confirmatory Forward | 5' GCAATACCCTGATCCTTAACGC 3'                                          |
| 7       | <i>cas op.</i> Knockout Forward     | 5' AGGCGTAGAGTGCTTTTATTATCCACATGCTGGAGTTTACGTGTAGGCTGGAGCTGCTTCG 3'   |
| 8       | <i>cas op.</i> Knockout Reverse     | 5' CAACAGGAAGAAAAGAAACCAACGCAGTCCATCCAATC CATATGAATATCCTCCTTA 3'      |
| 9       | <i>cas op.</i> confirmatory Forward | 5' CTTTGAGCGCTTCTTCCAG 3'                                             |
| 10      | Confirmatory Internal Primer        | 5' CTTTGAGCGCTTCTTCCAG 3'                                             |
| 11      | <i>fliC</i> (Forward)               | 5' GATAAGACGAACGGTGAGG 3'                                             |
| 12      | <i>fliC</i> (Reverse)               | 5' AGCCTCTGTCAAATCAGC 3'                                              |
| 13      | <i>flgK</i> (Forward)               | 5' GGATAACACCACCTTACAG 3'                                             |
| 14      | <i>flgK</i> (Reverse)               | 5' CAATCTCGGCTTCATTTGTC 3'                                            |
| 15      | <i>csgA</i> (Forward)               | 5' GGATTCCACGTTGAGCATT 3'                                             |
| 16      | <i>csgA</i> (Reverse)               | 5' TACTGTTATCCGCACCCT 3'                                              |
| 17      | <i>csgD</i> (Forward)               | 5' AACTGGCCTCATATTAACGG 3'                                            |
| 18      | <i>csgD</i> (Reverse)               | 5' GTGCGTAATCAGGTAACCTGG 3'                                           |
| 19      | <i>bcsA</i> (Forward)               | 5' GATGGACATTTGTTCTCCTG 3'                                            |
| 20      | <i>bcsA</i> (Reverse)               | 5' GCGTTGAAAGACATATTCC 3'                                             |
| 21      | <i>bcsC</i> (Forward)               | 5' GACCAGTTGAGCGGTAAA 3'                                              |
| 22      | <i>bcsC</i> (Reverse)               | 5' GTCGTAATGCCAGATCATGT 3'                                            |
| 23      | <i>rpoD</i> (Forward)               | 5' GATAAGACGAACGGTGAGG 3'                                             |
| 24      | <i>rpoD</i> (Reverse)               | 5' AGCCTCTGTCAAATCAGC 3'                                              |
| 11      | <i>fliC</i> (Forward)               | 5' GATAAGACGAACGGTGAGG 3'                                             |
| 12      | <i>fliC</i> (Reverse)               | 5' AGCCTCTGTCAAATCAGC 3'                                              |

|    |                       |                               |
|----|-----------------------|-------------------------------|
| 13 | <i>flgK</i> (Forward) | 5' GGATAACACCACCTTCACG 3'     |
| 14 | <i>flgK</i> (Reverse) | 5' CAATCTCGGCTTCATTTGTC 3'    |
| 15 | <i>csgA</i> (Forward) | 5' GGATTCCACGTTGAGCATT 3'     |
| 25 | <i>rfaC</i> (Forward) | 5' TACGATAAACCGCAGTCG 3'      |
| 26 | <i>rfaC</i> (Reverse) | 5' CTTCCGGCCAGTGTTA 3'        |
| 27 | <i>rfbG</i> (Forward) | 5' CTTGATGCGCCAACCTGTTCC 3'   |
| 28 | <i>rfbG</i> (Reverse) | 5' AAAGGCTGGGCTGCCATA 3'      |
| 29 | <i>yddX</i> (Forward) | 5' AAATACCTCAGCAGCACAAACC 3'  |
| 30 | <i>yddX</i> (Reverse) | 5' TCTTCAGTGACAACGCCTAAC 3'   |
| 31 | <i>crp</i> (Forward)  | 5' GGTTCTTGTCTCATTGCCA 3'     |
| 32 | <i>crp</i> (Reverse)  | 5' CGGAGCCTTTAACGATGTAG 3'    |
| 33 | <i>flgJ</i> (Forward) | 5' CGCAATCTCTGAACGAACTG 3'    |
| 34 | <i>flgJ</i> (Reverse) | 5' CGCATACTTTTCAGCATCATC 3'   |
| 35 | <i>rfbI</i> (Forward) | 5' TATCGGGCTGGTATCCATCTTGA 3' |
| 36 | <i>rfbI</i> (Reverse) | 5' CTTTGGAGTCAACAACCTTCTCC 3' |

687

688

689

690

691

692

693

694

695

696

697

698

699

700

701



702

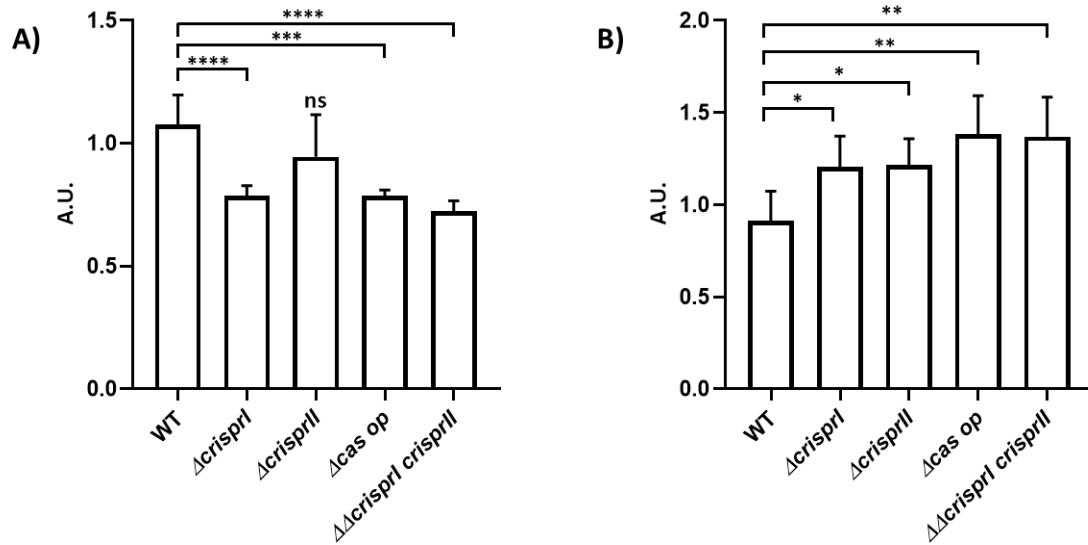

703

704

705

706

707

708

709

710

711

712

**Supplementary Figure S1: The CRISPR-Cas system knockout strains of *S. enterica* subsp. *enterica* serovar Typhimurium 14028s showed reduced biofilm formation at the solid-liquid interface (A), while these strains showed increased floating biofilm (pellicle) (B).** The *S. Typhimurium* strain 14028s wildtype (WT), CRISPR ( $\Delta$ crisprI,  $\Delta$ crisprII, and  $\Delta\Delta$ crisprI crisprII) and *cas operon* ( $\Delta$ cas op) knockout strains were cultured in Tryptic Soy Broth (TSB) media for 96 h, at 25°C, static condition in 24-well plastic plate. The biofilm formation was estimated using the crystal violet staining method. The graph represents OD<sub>570nm</sub> for each strain, normalized by OD<sub>570nm</sub> of WT biofilm. An unpaired t-test was used to determine significant differences between the WT and knockout strains. Error bars indicate SD. Statistical significance: \* $\leq$  0.05, \*\* $\leq$  0.01, \*\*\* $\leq$  0.001, \*\*\*\* $\leq$  0.0001, ns = not significant. A.U., arbitrary units.

713

714

715

716

717

718

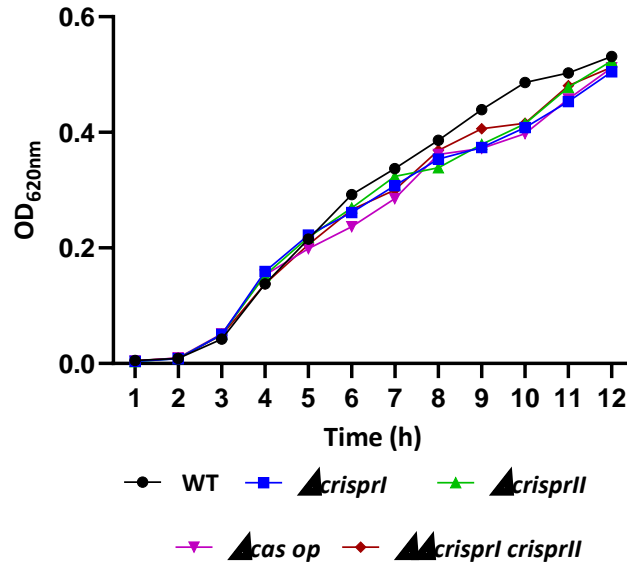

719

720

721

722

723

724

**Supplementary Figure S2: The CRISPR- Cas system knockout strains of *S. enterica* subsp. *enterica* serovar Typhimurium 14028s showed a similar growth trend to wildtype in LB without NaCl media.** The *S. Typhimurium* strain 14028s wildtype (WT), CRISPR ( $\Delta$ crisprI,  $\Delta$ crisprII, and  $\Delta\Delta$ crisprI crisprII) and *cas operon* ( $\Delta$ cas op) knockout strains were cultured in LB without NaCl media for 12 h, at 37°C, shaking condition. The graph represents OD<sub>620nm</sub> against time (h) for each strain.

725

726

727

728

729

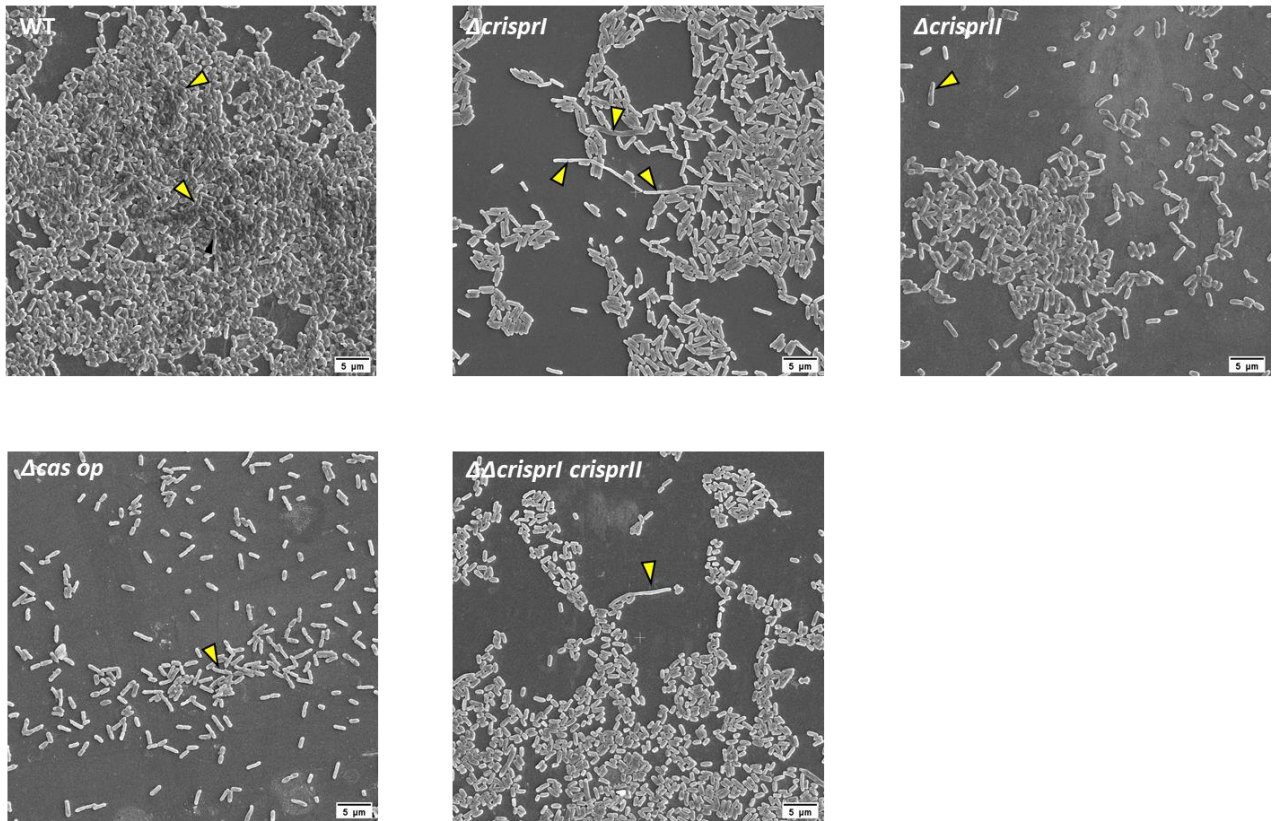

730

731

732

733

734

735

736

737

738

739

740

**Supplementary Figure S3: Morphology of air-exposed side of pellicle biofilm at early (24 h) time point.** The knockout ( $\Delta$ crisprI,  $\Delta$ crisprII,  $\Delta$ cas op., and  $\Delta\Delta$ crisprI crisprII) strains formed patchy bacterial aggregates, in comparison to wildtype (WT). WT biofilm had tightly packed bacterial aggregates covering a larger area, with a few dome-like structures (arrow-head in the WT micrograph). Few elongated cells (arrow-head in the micrographs) were also observed in the biofilms of the knockout strains. The strains were grown in LB without NaCl media for 24 h, at 25°C, static conditions. The pellicle biofilms formed were fixed using 2.5% glutaraldehyde and dehydrated with increasing ethanol concentrations. The images were captured at 5000X magnification and scaled to bar.

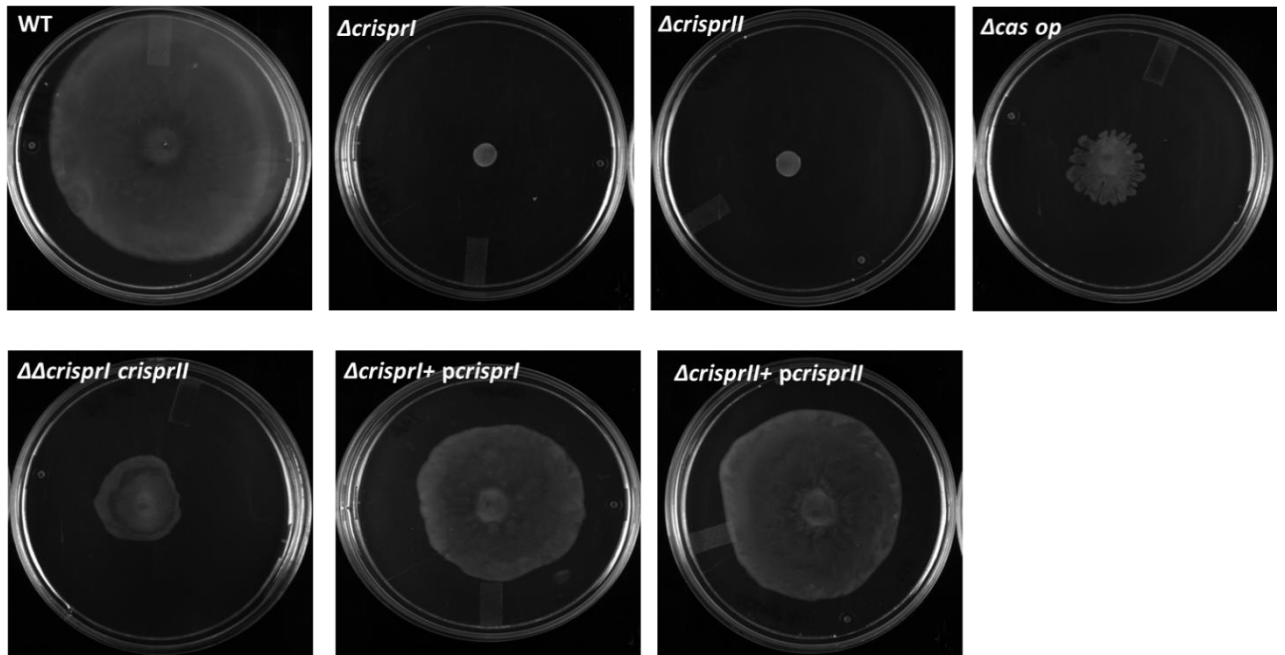

741

742

743

744

745

746

747

748

**Supplementary Figure S4: CRISPR-Cas system knockout strains show reduced swarming motility.** Swarm plates (0.5% agar, 20g/L of LB and 0.5% glucose) were point inoculated with overnight cultures and incubated at 37°C for 9 h. The complement strains ( $\Delta$ crisprI + pcrisprI,  $\Delta$ crisprII+ pcrisprII) showed reversal of swarming ability confirming the mutation process was not polar.

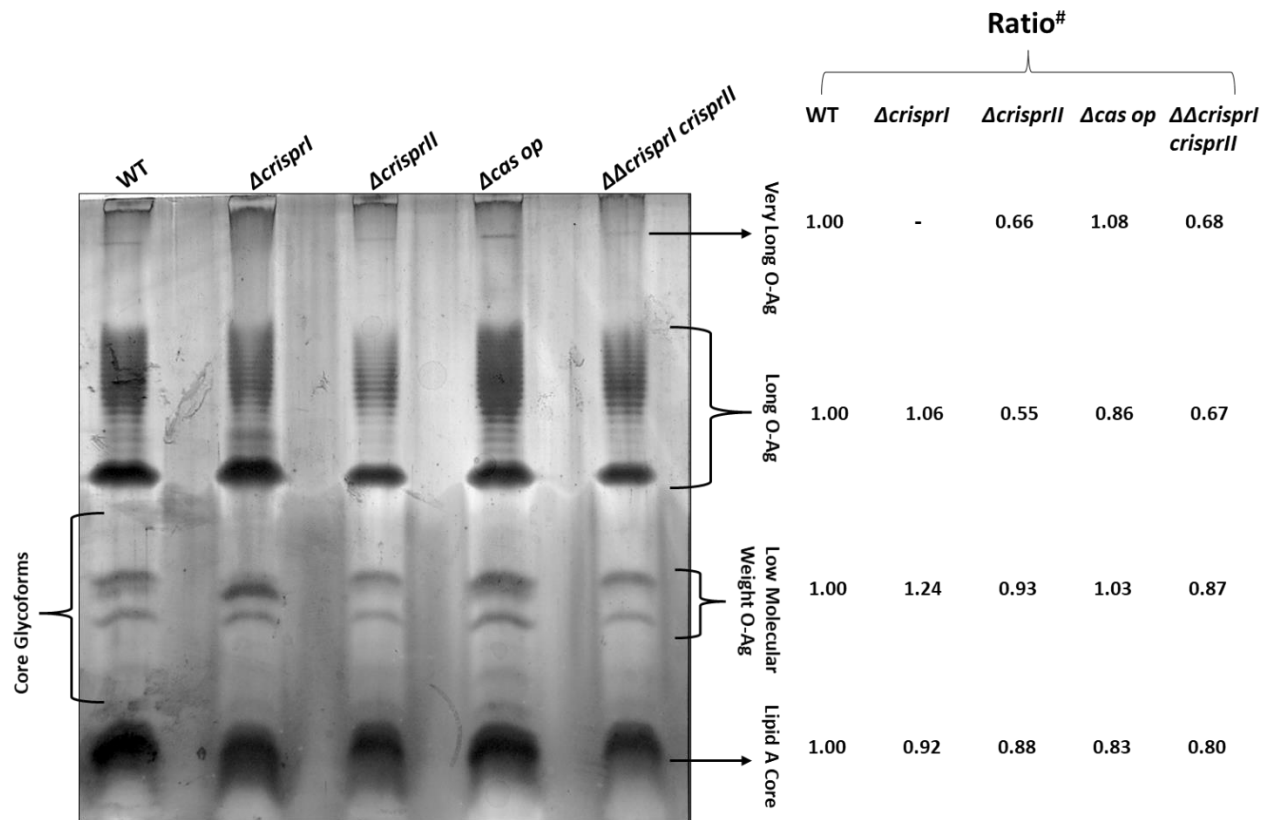

749

750

751

752

753

754

755

756

757

**Supplementary Figure S5: Silver-stained Lipopolysaccharide (LPS) profiling of wildtype (WT), and CRISPR-Cas system knockout strains.** The variation in O-antigen was analyzed by LPS profiling. The strains were grown in LB without NaCl media for 96 h, at 25°C, static conditions. Pellicle biofilm was homogenized and heated, followed by DNase, RNases, and Proteinase-K treatment to extract crude LPS. The processed samples were loaded on 15% SDS-PAGE MIDI gel, which was later stained using a silver staining kit. Variations in banding pattern and intensity between knockout ( $\Delta$ crisprI,  $\Delta$ crisprII,  $\Delta$ cas op, and  $\Delta\Delta$ crisprI crisprII) strains and WT were observed in long O-Ag, low molecular weight O-Ag, and core glycoforms regions. #Ratio indicates the intensity of the bands observed on the gel for all strains normalized by the corresponding band's intensity of wildtype sample.

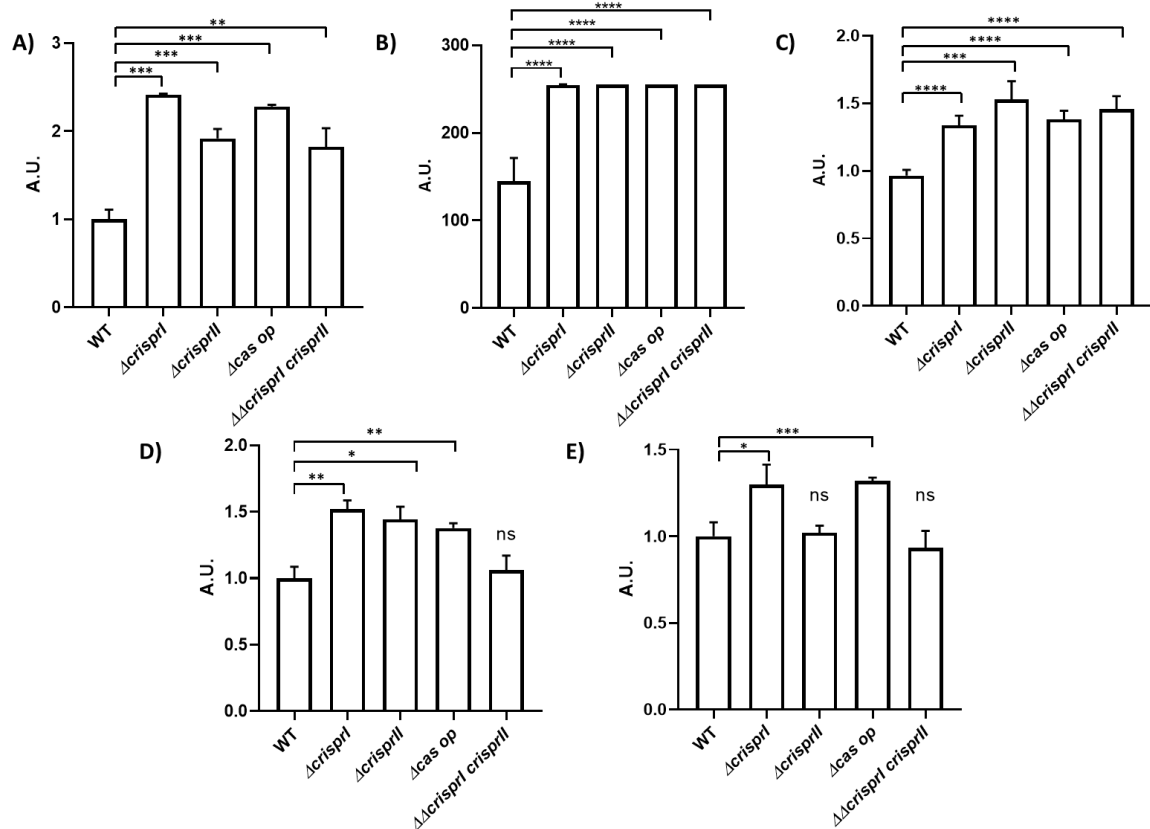

758

759

760

761

762

763

764

765

766

767

768

769

770

771

772

773

774

775

**Supplementary Figure S6: Compared to WT, CRISPR-Cas system knockout strains show differences in their metabolic activity (A), bacterial cell population (B), and ECM components like polysaccharides (C), protein (D), and DNA (E).** **A.** The metabolic activity was assessed by resazurin assay. *S. Typhimurium* strain 14028s wildtype (WT), CRISPR ( $\Delta$ crisprI,  $\Delta$ crisprII and  $\Delta\Delta$ crisprI crisprII) and *cas operon* ( $\Delta$ cas op) knockout strains were cultured in LB without NaCl media for 96 h, at 25°C, static condition. The pellicle biofilm formed after 96 h incubation was stained with resazurin dye and fluorescence was measured using a fluorimeter at excitation ( $\lambda_{Ex}$ ) 550 nm and emission ( $\lambda_{Em}$ ) of 600 nm. The graph represents the fluorescence intensity observed for each strain normalized by the fluorescence intensity of WT. **B** The pellicle biofilms formed by all the strains were stained with SYTO 9, for 30 mins in the dark, at RT. The graph represents the mean intensity of SYTO9 observed for each strain. **C.** The exopolysaccharides from the pellicle biofilms were quantified by the phenol-sulfuric acid method, by measuring absorbance at 490 nm. The graph represents absorbance observed at 490 nm for each strain normalized by absorbance observed at 490 nm for the WT sample. **D & E.** The protein and DNA concentrations in each sample were estimated spectrophotometrically and were further normalized by absorbance for WT in each case. An unpaired t-test was used to determine significant differences between the WT and knockout strains. Error bars indicate SD. Statistical significance: \* $\leq 0.05$ , \*\* $\leq 0.01$ , \*\*\* $\leq 0.001$ , \*\*\*\* $< 0.0001$ , ns = not significant. A.U., arbitrary units.

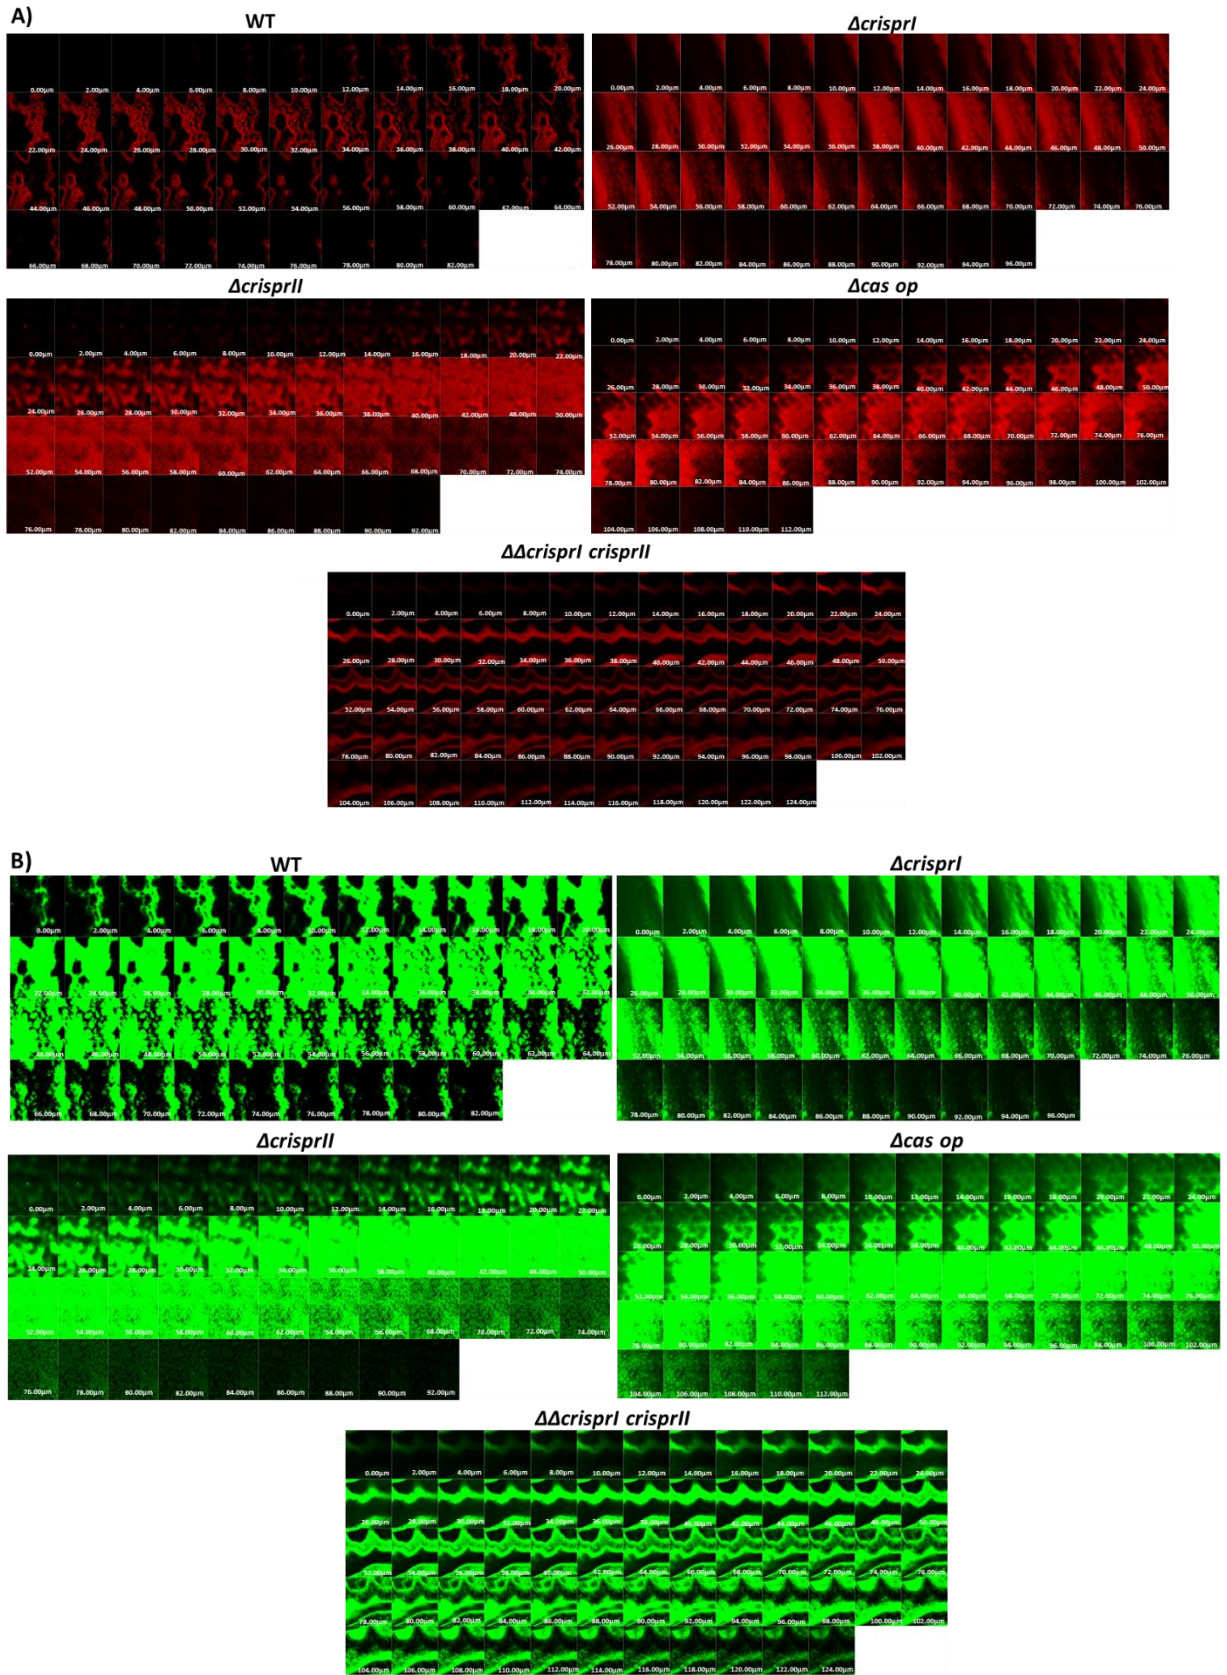

776

777

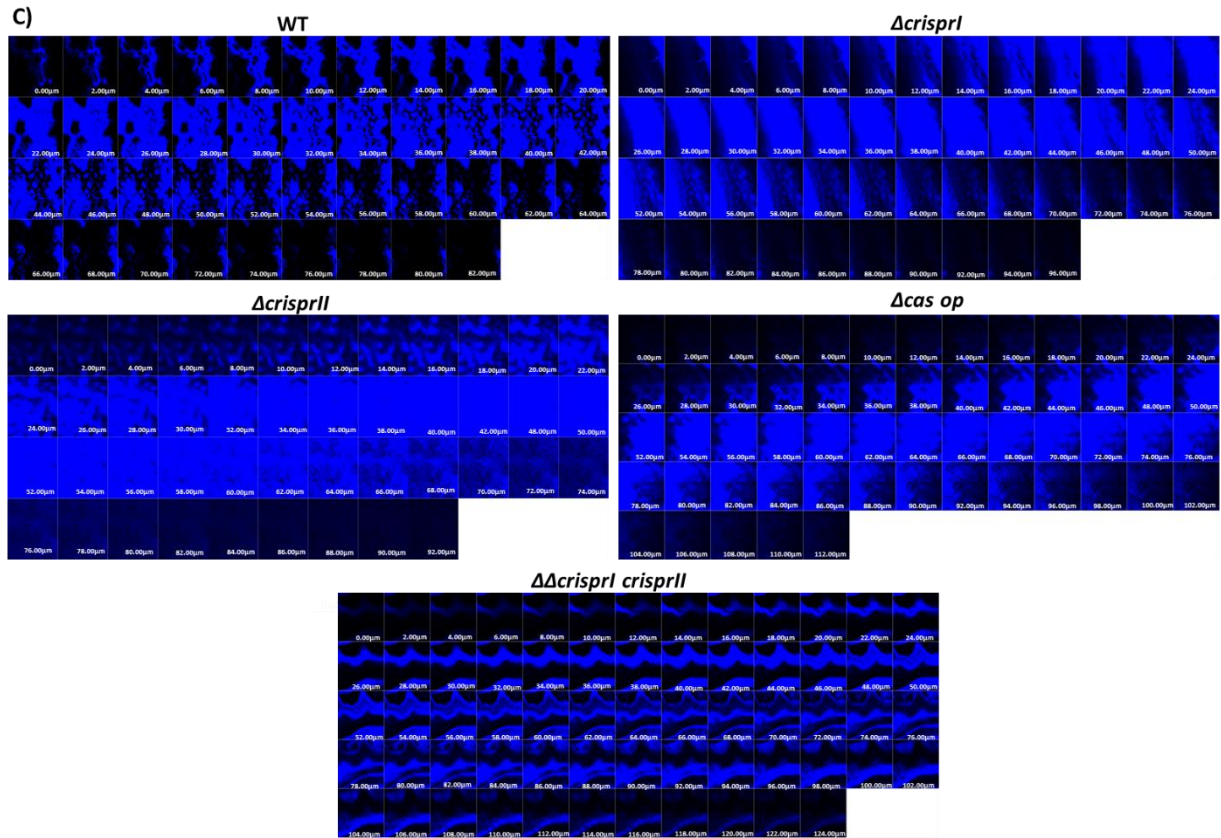

778

779

780

781

782

783

784

**Supplementary Figure S7. CLSM images (stacks) of wildtype and CRISPR-Cas knockout strains stained with Propidium Iodide (A), SYTO 9 (B) and Calcofluor white (C). The *S. Typhimurium* strain 14028s wildtype (WT), CRISPR (*ΔcrisprI*, *ΔcrisprII*, and *ΔΔcrisprI crisprII*) and *cas operon* (*Δcas op*) knockout strains were cultured in LB without NaCl media for 96 h, at 25°C, static condition. The pellicle biofilm formed was stained with Propidium iodide (PI), SYTO 9, and Calcofluor white for 30 mins in the dark, at RT. The Z-stacks of the CLSM images were captured and the stacks are represented here.**



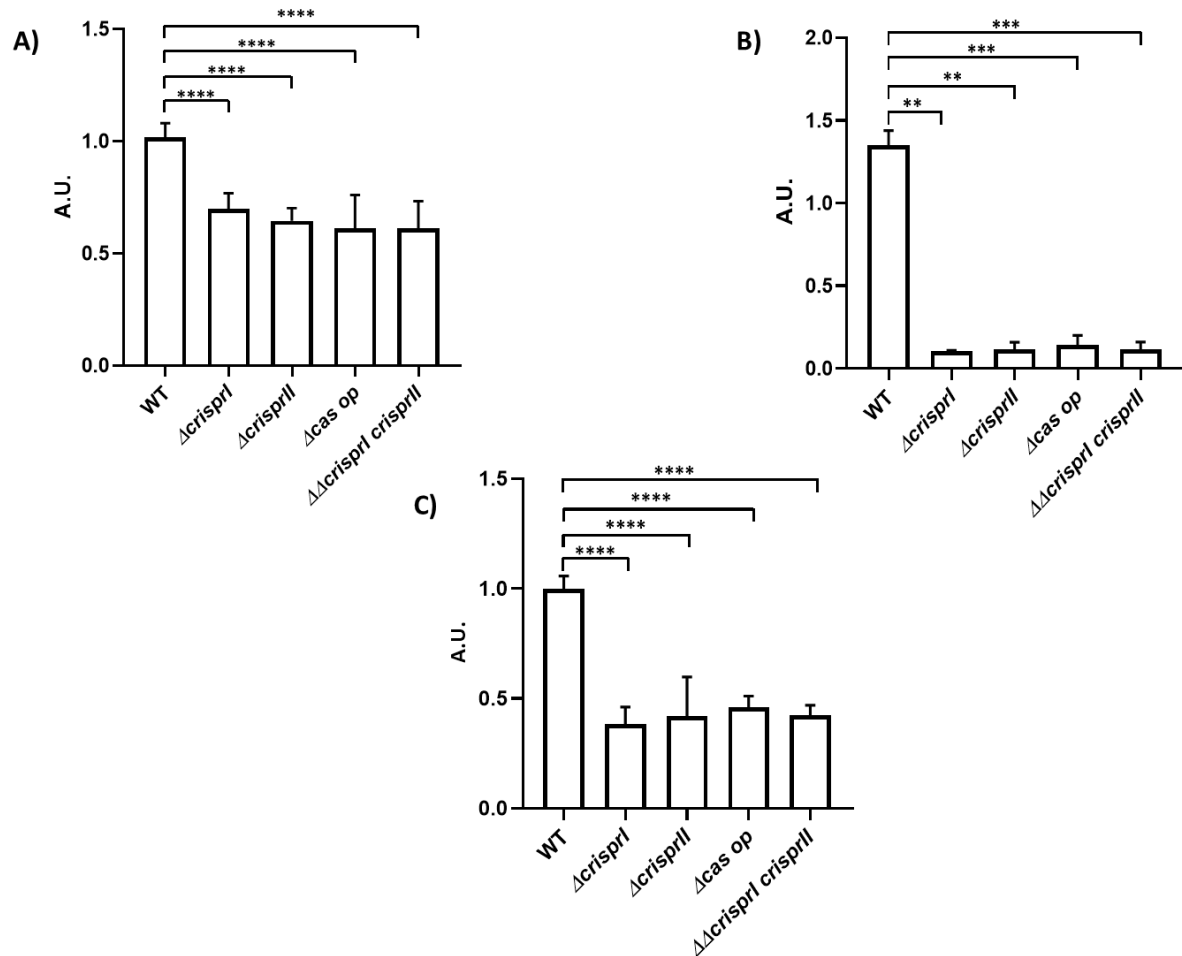

785

786 **Supplementary Figure S8: Planktonic culture of the CRISPR-Cas knockout strains showed variations in the**  
787 **productions of key components like curli (A), and cellulose (B). Though thicker than wildtype pellicle biofilm,**  
788 **pellicle biofilms formed by CRISPR-Cas knockout strains were found to be delicate (C). A.** Production of Curli by  
789 the planktonic bacteria of wildtype, CRISPR, and *cas operon* knockout strains was assessed with the help of Congo  
790 red depletion assay. The *S. Typhimurium* strain 14028s wildtype (WT), CRISPR ( $\Delta$ crisprI,  $\Delta$ crisprII, and  $\Delta\Delta$ crisprI  
791 crisprII) and *cas operon* ( $\Delta$ cas op) knockout strains were cultured in LB without NaCl media 48 h, at 25°C, static  
792 condition. Congo red depletion was determined by measuring the absorbance of the unbound Congo-red in the  
793 supernatant of cultures at 500 nm. The graph represents absorbance at 500 nm for each strain, normalized by  
794 absorbance at 500 nm for WT. **B.** The *S. Typhimurium* strain 14028s wildtype (WT), CRISPR ( $\Delta$ crisprI,  $\Delta$ crisprII, and  
795  $\Delta\Delta$ crisprI crisprII) and *cas operon* ( $\Delta$ cas op) knockout strains were cultured in LB without NaCl media for 96 h, at  
796 25°C, static condition. Cellulose production in the planktonic culture of wildtype, CRISPR, and *cas operon*  
797 knockout strains was quantified by anthrone assay. The graph represents the absorbance of the sample at 620  
798 nm. **C.** The strength of the pellicles were determined by checking the ability of the pellicle to withstand the weight  
799 of the glass beads (1 mm, HiMedia). The glass bead weight tolerated by pellicle of each strain was normalized to  
800 that of WT. An unpaired t-test was used to determine significant differences between the WT and knockout  
801 strains. Error bar indicates SD. Statistical significance: \* $\leq$  0.05, \*\* $\leq$  0.01, \*\*\* $\leq$  0.001, \*\*\*\* $\leq$  0.0001, ns = not  
802 significant. A.U., arbitrary units.

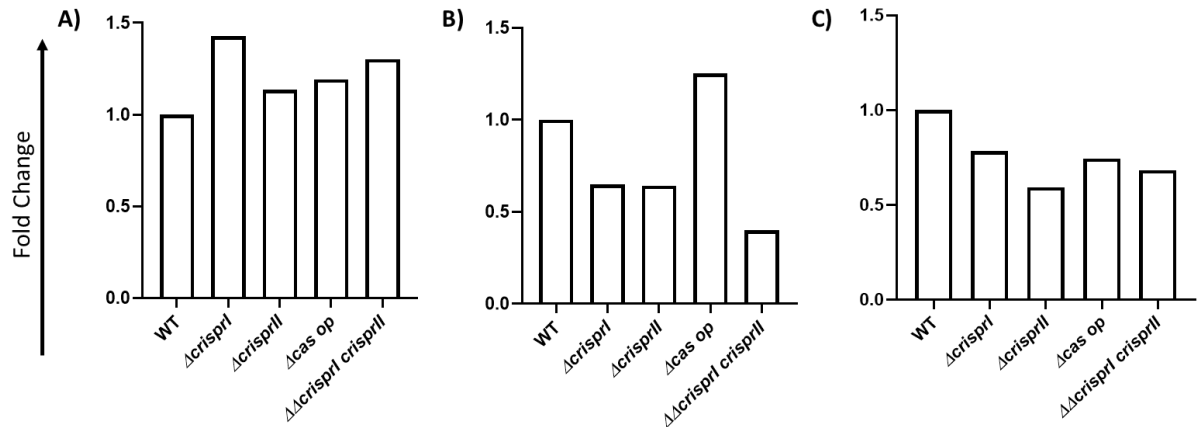

803

804

805

806

807

808

809

810

**Supplementary Figure S9: CRISPR-Cas system knockout strains showed differences in the expressions of genes associated with flagellar protein *flgJ* (A), *rfbI* (B), and *bcsA* (C) when compared to WT.** The *S. Typhimurium* strain 14028s wildtype (WT), CRISPR ( $\Delta$ crisprI,  $\Delta$ crisprII, and  $\Delta$ crisprI  $\Delta$ crisprII) and *cas operon* ( $\Delta$ cas op) knockout strains were cultured in LB without NaCl media for 24 h, at 25°C, static condition. Total RNA was isolated from bacteria using TRIzol reagent as per the manufacturer's instructions. 1  $\mu$ g of RNA was used for cDNA synthesis, followed by qRT-PCR. Relative expression of the gene was calculated using the  $2^{-\Delta\Delta C_t}$  method and normalized to reference gene *rpoD*.

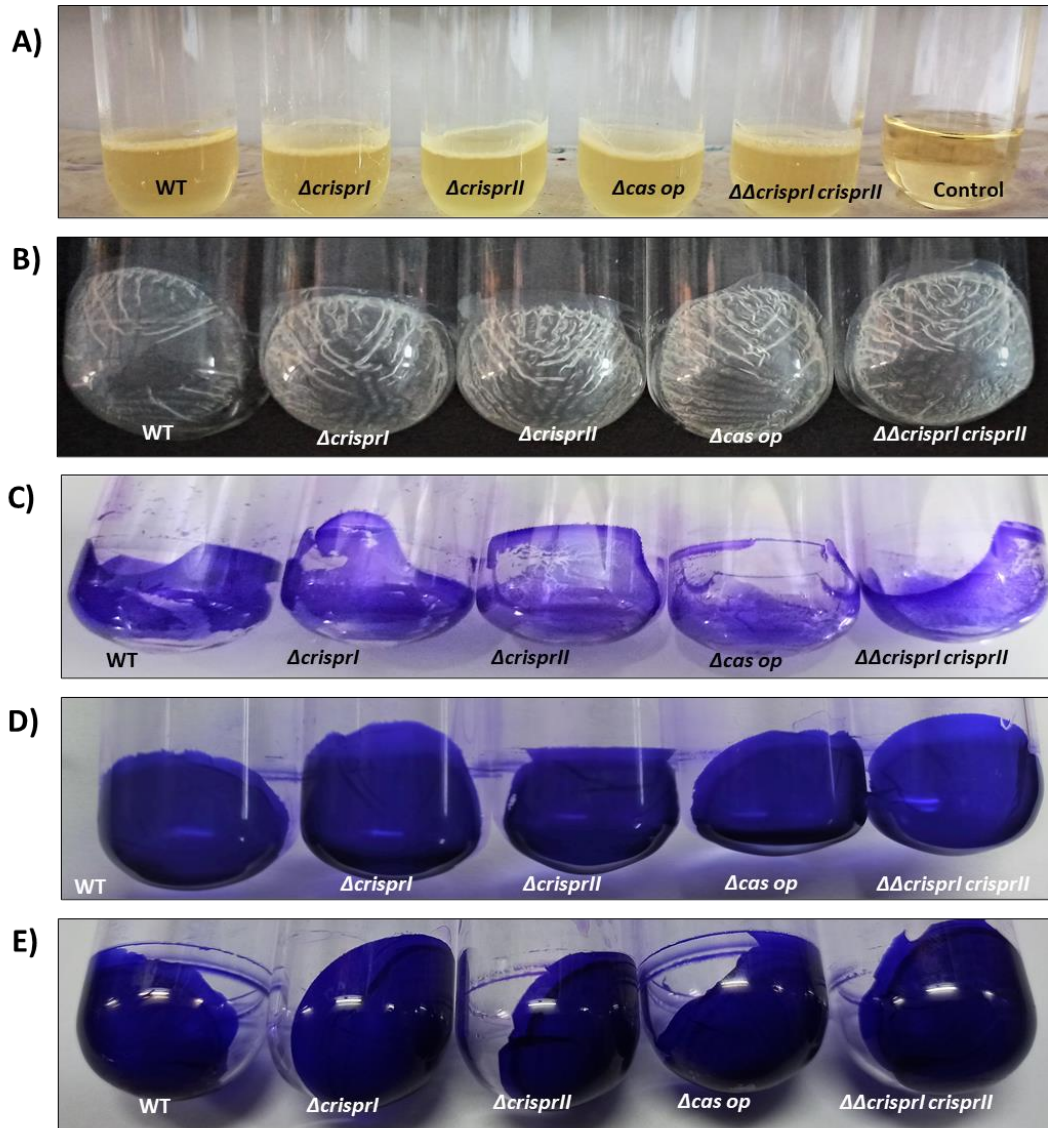

811

812

813

814

815

816

817

818

819

820

821

822

823

824

825

**Supplementary Figure S10: Representative images of Pellicle Biofilms.** **A.** Biofilm formation by *S. enterica* subsp. *enterica* serovar Typhimurium 14028s wildtype and CRISPR-Cas system knockout strains at air-liquid interphase (pellicle). **B.** Unstained pellicle biofilm of *S. enterica* subsp. *enterica* serovar Typhimurium 14028s wildtype and CRISPR-Cas system knockout strains. **C.** CV-stained, 24 h pellicle biofilm of *S. enterica* subsp. *enterica* serovar Typhimurium 14028s wildtype and CRISPR-Cas system knockout strains. **D.** CV-stained, 48 h pellicle biofilm of *S. enterica* subsp. *enterica* serovar Typhimurium 14028s wildtype and CRISPR-Cas system knockout strains. **E.** CV-stained, 96 h pellicle biofilm of *S. enterica* subsp. *enterica* serovar Typhimurium 14028s wildtype and CRISPR-Cas system knockout strains.

826

```
827 Alignment of
828 Sequence_1: [bcsC-reverse complement] with Sequence_2: [CRISPR1 array-spacer11]
829
830 Similarity : 14/3543 (0.40 %)
831
832 Seq_1 1      ttaccagtcagcgttaaggcaccagaggctgcggcggttaaattccatatccccctgccagcc 60
833 Seq_2 1      ----- 0
834
835 -----
836
837 Seq_1 1321   ggcggcgtcacgcaataccatcgcgctttccattgatggcggtgtgcttttgctgcgg 1380
838                               ||| ||| ||| ||| |||
839 Seq_2 1      -----ATATTGCGCGCTTTCATTACCGAACGTAAC----- 32
840
841 -----
842
843 Seq_1 3481   taaggcgtttcgaccgccagccggcaaaaagcgtgcatgagacttaacgtgaacttacg 3540
844 Seq_2 33      ----- 32
845
846 Seq_1 3541   cat 3543
847 Seq_2 33      --- 32
848
849
```

```
850 Alignment of
851 Sequence_1: [bcsC] with Sequence_2: [CRISPR1 array-spacer15]
852
853 Similarity : 21/3543 (0.59 %)
854
855 Seq_1 1      atgcgtaagttcacgttaagtctcatgcacgcttttttgcggctggcggtcgaaaagcc 60
856 Seq_2 1      ----- 0
857
858 -----
859
860 Seq_1 1321   aataccaatgctgtacgcgggctggcgaatctttatcgccagcagtcgcccgaaaaagcc 1380
861                               ||| ||| ||| ||| |||
862 Seq_2 1      -----AGCCGTTTCGGCTAAATACC 20
863
864 Seq_1 1381   gccgcgtttatcgcttctctttccgccagccagcggcgagcagtatcgacgatatcgaacgc 1440
865                               ||| | ||
866 Seq_2 21      CCCGCAGTGATT----- 32
867
868 Seq_1 3481   gcgggctggcagggggatgatgattaccgccgcagcctctggtgccttacgctgactgg 3540
869 Seq_2 33      ----- 32
870
871 Seq_1 3541   taa 3543
872 Seq_2 33      --- 32
873
874
875
876
877
878
879
880
881
882
883
884
885
886
887
888
889
890
891
892
```

893  
894  
895  
896  
897  
898  
899  
900  
901  
902  
903  
904  
905  
906  
907  
908  
909  
910  
911  
912  
913  
914  
915  
916  
917  
918  
919  
920  
921  
922  
923  
924  
925  
926  
927  
928  
929  
930  
931  
932  
933  
934  
935  
936  
937  
938  
939  
940  
941  
942  
943  
944  
945  
946  
947  
948  
949  
950  
951  
952  
953  
954  
955  
956  
957  
958  
959  
960

Alignment of  
Sequence\_1: [bcsC-reverse complement] with Sequence\_2: [CRISPR1 array-spacer15]

Similarity : 19/3543 (0.54 %)

```
Seq_1 1      ttaccagtcagcgttaaggcaccagaggctgcggcggttaaattccatatccccctgccagcc 60
Seq_2 1      ----- 0

-----

Seq_1 661    tttgggtgccggtattgctgctggcatccttttgcccgcctaaacgccagcagcagctgga 720
| || ||| | | | | | | | | | | | | | | | | | | | | | | | | | | | | | |
Seq_2 1      -----AGCCGTTTCGCTAAATACCCCGCAGTGATT---- 32

-----

Seq_1 3481   taaggcgttttcgaccgccagccggcctaaagcgtgcatgagacttaacgtgaacttacg 3540
Seq_2 33     ----- 32

Seq_1 3541   cat 3543
Seq_2 33     --- 32
```

Alignment of  
Sequence\_1: [bcsC] with Sequence\_2: [CRISPR1 array-spacer19]

Similarity : 18/3543 (0.51 %)

```
Seq_1 1      atgcgtaagttcacgttaagtctcatgcacgcttttttgccggtggcggtcgaaacgcc 60
Seq_2 1      ----- 0

-----

Seq_1 421    gaggcgcggtttactggcgacgaccggccataactgaacaagcgatcgccagctac-gac-a 478
|| |
Seq_2 1      -----AACGAATTG 9

-----

Seq_1 479    agctgtttaaaggttatccgccggaggcggaactggcggtcgaatactggacgaccgtgg 538
|| | || | | | | | | | | | | | | | | | | | | | | | | | | | | | | | | | |
Seq_2 10    AACTATTAGAGATTATTCGCT----- 32

-----

Seq_1 3479   cggcgggctggcaggggatatggatttaccgcgcagcctctggtgccttacgctgact 3538
Seq_2 33     ----- 32

Seq_1 3539   ggtaa 3543
Seq_2 33     ----- 32
```

```
961
962
963 Alignment of
964 Sequence_1: [bcsC] with Sequence_2: [CRISPR2 array-spacer18]
965
966 Similarity : 20/3543 (0.56 %)
967
968 Seq_1 1 atgcgtaagttcacgттаagtctcatgcacgcttttttgcggctggcggctcgaaacgcc 60
969 Seq_2 1 ----- 0
970
971 -----
972
973 Seq_1 2701 tggcgctgggatatcggcacgacgccgatgggctttaatgtcgttgatgtggttggcggc 2760
974 | | | | | | | | | | | | | | | | | | | | | |
975 Seq_2 1 -----G-TG-AGTTCGGTTTTTAATTCGTCGCTAAGCTGC----- 33
976
977 -----
978
979 Seq_1 3481 gcgggctggcaggggggatatggatttaccgccgcagcctctggtgccttacgctgactgg 3540
980 Seq_2 34 ----- 33
981
982
983 Seq_1 3541 taa 3543
984 Seq_2 34 --- 33
985
986
987 Alignment of
988 Sequence_1: [bcsC-reverse complement] with Sequence_2: [CRISPR2 array-spacer26]
989
990 Similarity : 21/3543 (0.59 %)
991
992 Seq_1 1 ttaccagtcagcgtaaggcaccagaggctgcccgggtaaataccatatccccctgccagcc 60
993 Seq_2 1 ----- 0
994
995 -----
996
997 Seq_1 1261 cattgcgctctttgtaggtctccagcgcccgtgcccgtcgcctgaaagc 1320
998 | | | |
999 Seq_2 1 -----CGTTC--ATC 8
1000 Seq_1 1321 ggcggcgctcacgcaataccatcgcgctttccattgatggcggctgtgcttttgctgcgg 1380
1001 ||| ||||| | | | | |
1002 Seq_2 9 GGCAGCGTCACGCAATATGAAGAT----- 32
1003
1004 -----
1005
1006 Seq_1 3481 taaggcgtttcgaccgccagccggcaaaaaagcgtgcatgagacttaacgtgaacttacg 3540
1007 Seq_2 33 ----- 32
1008
1009 Seq_1 3541 cat 3543
1010 Seq_2 33 --- 32
1011
1012
```

**Supplementary Figure S11: Partial complementarity between spacers (spacer 11, 15 and 19 in CRISPRI array and 18 and 26 in CRISPRII array) and *bcsC* gene.** The coding and the reverse complement (template) sequence of the *bcsC* gene were extracted from a complete-genome sequence of Typhimurium str. 14028S, NCBI (GenBank: CP001363.1). The spacer sequences of CRISPRI and CRISPRII arrays were then aligned with coding and reverse complement of *bcsC* gene using serial cloner version 2.6 software. The putative PAM sequences are highlighted in yellow.

1019

1020

1021

1022

**Reference**

1023 [1] T. Masuko, A. Minami, N. Iwasaki, T. Majima, S. Nishimura, and Y. C. Lee, "Carbohydrate analysis by a  
1024 phenol-sulfuric acid method in microplate format," *Anal Biochem*, vol. 339, no. 1, pp. 69–72, 2005,  
1025 doi: 10.1016/j.ab.2004.12.001.

1026

1027

1028

1029

1030

1031
